# Supplementary material for: Policy Support for Electrolytic Hydrogen: Impact of Alternative Carbon Accounting Rules
Source: Research Square preprint supplement (doi:10.21203/rs.3.rs-7047727/v1), 2025-08-05
Supplement: Supplementary file 1 [file 90509e94ad3e4b95b97f7a1d.xlsx]

## Sheet: Introduction
Policy Support for Electrolytic Hydrogen: Implications of Alternative Carbon Accounting Rules
		General Information
		Gunther Glenk*
		Business School, University of Mannheim
		CEEPR, Massachusetts Institute of Technology
		glenk@uni-mannheim.de
		Philip Holler*
		Business School, University of Mannheim
		philip.holler@uni-mannheim.de
		Stefan Reichelstein
		Business School, University of Mannheim
		Graduate School of Business, Stanford University
		ZEW - Leibniz Centre for European Economic Research
		reichelstein@uni-mannheim.de
		June 2025
		* Corresponding authors
		Outline of the file
		• Figures and Supplementary Figures
		• Model Inputs
		• Model Outputs

## Sheet: Graphs
Figure 1
Figure 2
Figure 3
Figure 4
Figure 5
Figure 6
Supplementary Figure 1
Supplementary Figure 2
Supplementary Figure 3
Supplementary Figure 4

## Sheet: Renewable CFs
Hour	Wind Capacity Factor - CF_w(t)	Solar Capacity Factor - CF_s(t)
1	0.664007	0
2	0.75439	0
3	0.750852	0
4	0.684634	0
5	0.595997	0
6	0.528824	0
7	0.543148	0
8	0.595061	0
9	0.649022	0.0182098
10	0.662739	0.0220691
11	0.64278	0.0263481
12	0.607737	0.0258458
13	0.58864	0.0231734
14	0.586074	0.0414822
15	0.516724	0.0397119
16	0.219627	0.0279905
17	0.166847	0.0186025
18	0.38889	0.0113948
19	0.443668	0
20	0.436911	0
21	0.436917	0
22	0.478891	0
23	0.450153	0
24	0.463948	0
25	0.501877	0
26	0.523011	0
27	0.617724	0
28	0.793643	0
29	0.843918	0
30	0.737569	0
31	0.585745	0
32	0.531607	0
33	0.512704	0.0138571
34	0.463346	0.0232328
35	0.424813	0.0836
36	0.384254	0.0850384
37	0.33026	0.108925
38	0.291204	0.109433
39	0.224071	0.202658
40	0.127113	0.646228
41	0.0610887	0.564808
42	0.026795	0.0146735
43	0.0106417	0
44	0.002633	0
45	0.000564333	0
46	0.000573	0
47	0.002945	0
48	0.015986	0
49	0.055735	0
50	0.133992	0
51	0.266592	0
52	0.434413	0
53	0.562076	0
54	0.612689	0
55	0.618034	0
56	0.615392	0
57	0.612379	0.58425
58	0.617407	0.780575
59	0.626662	0.840605
60	0.62718	0.866225
61	0.620641	0.869566
62	0.619734	0.869566
63	0.521243	0.850139
64	0.366074	0.807866
65	0.609878	0.681747
66	0.731203	0.222534
67	0.749762	0
68	0.747929	0
69	0.736148	0
70	0.704862	0
71	0.618922	0
72	0.717111	0
73	0.842468	0
74	0.846284	0
75	0.838829	0
76	0.838141	0
77	0.831913	0
78	0.831129	0
79	0.837985	0
80	0.840689	0
81	0.838676	0.646848
82	0.834802	0.792978
83	0.824681	0.834213
84	0.79287	0.849391
85	0.762563	0.851117
86	0.781149	0.845291
87	0.755474	0.829506
88	0.556797	0.786262
89	0.427505	0.692717
90	0.732079	0.260811
91	0.858664	0
92	0.881628	0
93	0.887728	0
94	0.871511	0
95	0.771599	0
96	0.816432	0
97	0.861876	0
98	0.865684	0
99	0.844035	0
100	0.823212	0
101	0.838733	0
102	0.860157	0
103	0.893608	0
104	0.866878	0
105	0.819219	0.640316
106	0.834649	0.802264
107	0.840223	0.854694
108	0.823165	0.869566
109	0.76184	0.864798
110	0.731524	0.855164
111	0.740961	0.830681
112	0.713585	0.775466
113	0.599066	0.676375
114	0.480429	0.250127
115	0.448415	0
116	0.484041	0
117	0.516195	0
118	0.491221	0
119	0.399065	0
120	0.241067	0
121	0.143944	0
122	0.159087	0
123	0.267035	0
124	0.327417	0
125	0.328143	0
126	0.314449	0
127	0.298946	0
128	0.362302	0
129	0.279953	0.405834
130	0.181136	0.773573
131	0.137505	0.716017
132	0.118672	0.843737
133	0.100819	0.848542
134	0.0774703	0.841087
135	0.057674	0.825353
136	0.038249	0.786302
137	0.0229887	0.68973
138	0.0152013	0.158164
139	0.020484	0
140	0.032921	0
141	0.0375027	0
142	0.0309523	0
143	0.0266757	0
144	0.0530063	0
145	0.148199	0
146	0.22486	0
147	0.259492	0
148	0.287848	0
149	0.327452	0
150	0.361528	0
151	0.361552	0
152	0.33419	0
153	0.294013	0.691109
154	0.254059	0.828523
155	0.237449	0.868333
156	0.235469	0.869566
157	0.231234	0.86262
158	0.216371	0.860945
159	0.16033	0.852712
160	0.188114	0.820264
161	0.239311	0.735006
162	0.279373	0.30745
163	0.307861	0
164	0.313913	0
165	0.312997	0
166	0.291157	0
167	0.288829	0
168	0.606425	0
169	0.831162	0
170	0.847564	0
171	0.819662	0
172	0.777207	0
173	0.725174	0
174	0.66366	0
175	0.599344	0
176	0.517355	0
177	0.415375	0.594769
178	0.316371	0.772666
179	0.27009	0.528814
180	0.230906	0.537984
181	0.199166	0.439595
182	0.185365	0.849298
183	0.167898	0.551652
184	0.157594	0.102847
185	0.108718	0.466984
186	0.0841913	0.225025
187	0.0908367	0
188	0.110033	0
189	0.092577	0
190	0.0686763	0
191	0.0300247	0
192	0.025043	0
193	0.0714103	0
194	0.139007	0
195	0.222033	0
196	0.306027	0
197	0.332671	0
198	0.258096	0
199	0.133791	0
200	0.050717	0
201	0.018946	0.0109154
202	0.00884733	0.00607633
203	0.005405	0.0711883
204	0.003084	0.227381
205	0.00383367	0.280045
206	0.00419233	0.39325
207	0.00346767	0.128759
208	0.00287267	0.117931
209	0.003511	0.643525
210	0.01108	0.246539
211	0.0385667	0
212	0.0923103	0
213	0.119438	0
214	0.124655	0
215	0.116801	0
216	0.305471	0
217	0.540443	0
218	0.589445	0
219	0.577784	0
220	0.574144	0
221	0.531504	0
222	0.449912	0
223	0.410112	0
224	0.362984	0
225	0.440775	0.517977
226	0.594174	0.0326372
227	0.626967	0.067153
228	0.534236	0.188159
229	0.360582	0.134109
230	0.368014	0.199356
231	0.482408	0.0597434
232	0.429884	0.644653
233	0.580391	0.421236
234	0.88186	0.145897
235	0.931209	0
236	0.934456	0
237	0.931489	0
238	0.905006	0
239	0.816295	0
240	0.743993	0
241	0.814794	0
242	0.88336	0
243	0.91299	0
244	0.918506	0
245	0.914728	0
246	0.906844	0
247	0.911762	0
248	0.910349	0
249	0.895917	0.625911
250	0.867551	0.722823
251	0.842051	0.869566
252	0.803599	0.869566
253	0.774174	0.869566
254	0.761401	0.869566
255	0.65418	0.869566
256	0.303665	0.830078
257	0.163965	0.730895
258	0.158608	0.356141
259	0.208365	0
260	0.210396	0
261	0.169004	0
262	0.093925	0
263	0.0208667	0
264	0.000432667	0
265	0.0301497	0
266	0.300983	0
267	0.696417	0
268	0.816487	0
269	0.810798	0
270	0.771574	0
271	0.747901	0
272	0.750862	0
273	0.750806	0.22903
274	0.727749	0.125856
275	0.704494	0.850302
276	0.720482	0.599486
277	0.772303	0.821237
278	0.804713	0.677797
279	0.731313	0.78285
280	0.446704	0.767036
281	0.342583	0.222595
282	0.684296	0.0681247
283	0.8369	0
284	0.871773	0
285	0.875649	0
286	0.821524	0
287	0.7303	0
288	0.749426	0
289	0.7841	0
290	0.812888	0
291	0.82526	0
292	0.872094	0
293	0.937536	0
294	0.944301	0
295	0.929458	0
296	0.927504	0
297	0.914398	0.029317
298	0.911742	0.0885295
299	0.908456	0.213258
300	0.883915	0.361762
301	0.834811	0.247316
302	0.784831	0.354264
303	0.64861	0.37002
304	0.49782	0.298137
305	0.614904	0.279573
306	0.69622	0.121167
307	0.769889	0
308	0.827971	0
309	0.84922	0
310	0.831234	0
311	0.727735	0
312	0.532535	0
313	0.31222	0
314	0.170212	0
315	0.190773	0
316	0.39028	0
317	0.663605	0
318	0.80524	0
319	0.85011	0
320	0.858255	0
321	0.858914	0.57715
322	0.856518	0.585853
323	0.866691	0.800677
324	0.880385	0.820142
325	0.883772	0.821961
326	0.883243	0.815505
327	0.819674	0.795209
328	0.76814	0.749845
329	0.803611	0.659411
330	0.748575	0.264367
331	0.733054	0
332	0.696959	0
333	0.653264	0
334	0.676274	0
335	0.680567	0
336	0.670455	0
337	0.717051	0
338	0.743988	0
339	0.78805	0
340	0.793581	0
341	0.703922	0
342	0.506554	0
343	0.276105	0
344	0.111379	0
345	0.0453773	0.0124645
346	0.018119	0.0505191
347	0.00564833	0.0518028
348	0.00268667	0.0113818
349	0.00218633	0.0338822
350	0.005572	0.0547487
351	0.0161353	0.118956
352	0.0474497	0.108668
353	0.146077	0.132721
354	0.171995	0.0122467
355	0.188274	0
356	0.192738	0
357	0.185632	0
358	0.171109	0
359	0.141453	0
360	0.176029	0
361	0.338671	0
362	0.539097	0
363	0.680579	0
364	0.763992	0
365	0.79178	0
366	0.78822	0
367	0.783431	0
368	0.774358	0
369	0.768381	0.00788831
370	0.785216	0.00518573
371	0.812581	0.0135161
372	0.823861	0.0240658
373	0.823158	0.0607481
374	0.824661	0.0307056
375	0.716644	0.0986125
376	0.511332	0.0838692
377	0.413974	0.0146215
378	0.286483	0.00234045
379	0.216467	0
380	0.201198	0
381	0.261764	0
382	0.38155	0
383	0.526145	0
384	0.651324	0
385	0.759526	0
386	0.752345	0
387	0.672401	0
388	0.604824	0
389	0.598393	0
390	0.592479	0
391	0.527855	0
392	0.428617	0
393	0.358781	0.00780089
394	0.284431	0.0046087
395	0.214993	0.0199663
396	0.155248	0.0575719
397	0.110571	0.0415956
398	0.0855457	0.0118848
399	0.070168	0.0260145
400	0.052801	0.0193075
401	0.228848	0.0208203
402	0.233377	0.00339391
403	0.231177	0
404	0.224232	0
405	0.194618	0
406	0.142666	0
407	0.109036	0
408	0.238609	0
409	0.536127	0
410	0.704445	0
411	0.75479	0
412	0.73678	0
413	0.706119	0
414	0.664826	0
415	0.603741	0
416	0.560111	0
417	0.51943	0.620803
418	0.470926	0.808211
419	0.458833	0.865895
420	0.472575	0.869566
421	0.492405	0.869566
422	0.501891	0.869566
423	0.413199	0.865109
424	0.144407	0.833403
425	0.152817	0.749052
426	0.214942	0.453606
427	0.238727	0
428	0.270944	0
429	0.28649	0
430	0.327693	0
431	0.367308	0
432	0.395903	0
433	0.391522	0
434	0.371485	0
435	0.369012	0
436	0.355478	0
437	0.343817	0
438	0.329927	0
439	0.269205	0
440	0.186648	0
441	0.134741	0.686073
442	0.0852623	0.840898
443	0.0521563	0.869566
444	0.0463647	0.869566
445	0.0443453	0.869566
446	0.048028	0.869566
447	0.0416647	0.869566
448	0.015971	0.830959
449	0.00490533	0.618642
450	0.0388207	0.44062
451	0.0663433	0
452	0.078054	0
453	0.0827087	0
454	0.098906	0
455	0.0856867	0
456	0.115659	0
457	0.286495	0
458	0.517816	0
459	0.6812	0
460	0.774902	0
461	0.765232	0
462	0.756601	0
463	0.746809	0
464	0.73952	0
465	0.740265	0.625673
466	0.715597	0.197006
467	0.698932	0.129581
468	0.733327	0.510848
469	0.791894	0.845303
470	0.783461	0.838441
471	0.681068	0.734258
472	0.375394	0.784059
473	0.544859	0.703577
474	0.779106	0.404586
475	0.808208	0
476	0.796167	0
477	0.77847	0
478	0.74664	0
479	0.667062	0
480	0.657673	0
481	0.726336	0
482	0.834164	0
483	0.921317	0
484	0.922994	0
485	0.88646	0
486	0.834804	0
487	0.739442	0
488	0.599689	0
489	0.425989	0.509241
490	0.288709	0.15663
491	0.256866	0.282938
492	0.337993	0.510894
493	0.462052	0.574578
494	0.534954	0.234275
495	0.371195	0.272211
496	0.114095	0.225814
497	0.048367	0.161528
498	0.006458	0.0208075
499	0.000440333	0
500	0.00599367	0
501	0.025954	0
502	0.0473203	0
503	0.0566847	0
504	0.0755143	0
505	0.154601	0
506	0.30707	0
507	0.489806	0
508	0.64813	0
509	0.711042	0
510	0.716355	0
511	0.679173	0
512	0.62366	0
513	0.584071	0.00499628
514	0.60399	0.00631544
515	0.606103	0.0693706
516	0.544859	0.0249416
517	0.515285	0.104519
518	0.536486	0.113148
519	0.444788	0.234716
520	0.11632	0.75335
521	0.0641193	0.668303
522	0.117445	0.374206
523	0.128534	0
524	0.0977687	0
525	0.0493837	0
526	0.0387653	0
527	0.0214907	0
528	0.069339	0
529	0.129871	0
530	0.151591	0
531	0.17554	0
532	0.216009	0
533	0.228518	0
534	0.182957	0
535	0.134907	0
536	0.119294	0
537	0.212987	0.630862
538	0.374548	0.790652
539	0.427648	0.839136
540	0.477511	0.852033
541	0.610092	0.851428
542	0.703319	0.842223
543	0.822776	0.82272
544	0.81302	0.783894
545	0.801323	0.703923
546	0.806796	0.441589
547	0.770768	0
548	0.753011	0
549	0.760849	0
550	0.769771	0
551	0.761707	0
552	0.758042	0
553	0.772503	0
554	0.789224	0
555	0.761854	0
556	0.65235	0
557	0.489841	0
558	0.318791	0
559	0.178154	0
560	0.0955233	0
561	0.074651	0.608327
562	0.0414457	0.739211
563	0.026219	0.773322
564	0.0217	0.742412
565	0.0251043	0.83038
566	0.0169003	0.830475
567	0.0240443	0.819072
568	0.032336	0.785344
569	0.0402783	0.706244
570	0.0645013	0.448831
571	0.0835583	0
572	0.113075	0
573	0.134694	0
574	0.127453	0
575	0.080364	0
576	0.0261303	0
577	0.004606	0
578	0.000801333	0
579	0.0332367	0
580	0.121248	0
581	0.204529	0
582	0.283	0
583	0.390782	0
584	0.53488	0
585	0.625443	0.101522
586	0.67701	0.197064
587	0.698909	0.188417
588	0.698319	0.108632
589	0.695755	0.0738836
590	0.66393	0.0893744
591	0.51134	0.0489731
592	0.257058	0.0249459
593	0.159999	0.0158484
594	0.133102	0.00934708
595	0.0857903	0
596	0.060298	0
597	0.0370103	0
598	0.018016	0
599	0.0061	0
600	0.0209943	0
601	0.066921	0
602	0.116757	0
603	0.187554	0
604	0.288796	0
605	0.347482	0
606	0.347461	0
607	0.396598	0
608	0.497836	0
609	0.592543	0.639331
610	0.662966	0.788928
611	0.712851	0.829506
612	0.736665	0.838883
613	0.754572	0.840905
614	0.78501	0.839609
615	0.712111	0.827019
616	0.472819	0.792841
617	0.827399	0.717464
618	0.943171	0.496842
619	0.960666	0
620	0.968269	0
621	0.968785	0
622	0.956367	0
623	0.901466	0
624	0.810793	0
625	0.767932	0
626	0.713123	0
627	0.67223	0
628	0.701101	0
629	0.764097	0
630	0.784351	0
631	0.783336	0
632	0.769763	0
633	0.727548	0.597186
634	0.623658	0.767295
635	0.538197	0.814511
636	0.623665	0.837266
637	0.768777	0.842641
638	0.923853	0.836681
639	0.920457	0.817959
640	0.837842	0.780614
641	0.626375	0.698811
642	0.388107	0.413794
643	0.228808	0
644	0.147889	0
645	0.103239	0
646	0.0775543	0
647	0.0779833	0
648	0.106238	0
649	0.168439	0
650	0.202962	0
651	0.191569	0
652	0.175508	0
653	0.168523	0
654	0.157927	0
655	0.135684	0
656	0.136622	0
657	0.157637	0.637009
658	0.160936	0.812769
659	0.183321	0.869031
660	0.231287	0.869566
661	0.278463	0.869566
662	0.302412	0.570337
663	0.295144	0.806727
664	0.21034	0.816327
665	0.185115	0.32903
666	0.185367	0.480473
667	0.192919	0
668	0.204121	0
669	0.216966	0
670	0.210002	0
671	0.172115	0
672	0.13382	0
673	0.139013	0
674	0.13405	0
675	0.117609	0
676	0.0835427	0
677	0.0587447	0
678	0.0583663	0
679	0.099881	0
680	0.166858	0.00220705
681	0.195734	0.710984
682	0.187735	0.854672
683	0.194597	0.869566
684	0.227811	0.869566
685	0.270864	0.869566
686	0.301395	0.869566
687	0.259629	0.869566
688	0.347085	0.845837
689	0.356492	0.772412
690	0.36679	0.5536
691	0.324929	0
692	0.265148	0
693	0.231284	0
694	0.224058	0
695	0.210408	0
696	0.430954	0
697	0.773136	0
698	0.854759	0
699	0.862623	0
700	0.842522	0
701	0.801643	0
702	0.729844	0
703	0.665779	0
704	0.656041	0.00106638
705	0.653085	0.542784
706	0.627603	0.0196312
707	0.643224	0.0515523
708	0.710025	0.114421
709	0.7583	0.120947
710	0.775811	0.125671
711	0.648525	0.0767562
712	0.431809	0.159289
713	0.493783	0.128861
714	0.701096	0.0190923
715	0.686476	0
716	0.640856	0
717	0.583281	0
718	0.519561	0
719	0.406017	0
720	0.362043	0
721	0.38163	0
722	0.391544	0
723	0.480217	0
724	0.632307	0
725	0.670624	0
726	0.638791	0
727	0.635994	0
728	0.677796	0.0378745
729	0.714026	0.612417
730	0.694548	0.585434
731	0.651922	0.616773
732	0.613597	0.804709
733	0.573552	0.472153
734	0.528542	0.852016
735	0.432901	0.836827
736	0.168286	0.81337
737	0.12173	0.721345
738	0.181803	0.417917
739	0.166548	0
740	0.175569	0
741	0.262557	0
742	0.342357	0
743	0.325599	0
744	0.399172	0
745	0.614923	0
746	0.710756	0
747	0.69443	0
748	0.585731	0
749	0.447663	0
750	0.341433	0
751	0.270332	0
752	0.240171	0.075507
753	0.276057	0.708908
754	0.310643	0.831436
755	0.28189	0.867005
756	0.252566	0.869566
757	0.226109	0.869566
758	0.221226	0.869566
759	0.182571	0.856692
760	0.0453087	0.82543
761	0.019209	0.753092
762	0.0324463	0.555505
763	0.0310163	0
764	0.034209	0
765	0.033124	0
766	0.025704	0
767	0.015065	0
768	0.130906	0
769	0.361575	0
770	0.540611	0
771	0.675248	0
772	0.730884	0
773	0.727781	0
774	0.747876	0
775	0.75951	0
776	0.762659	0.0997944
777	0.701089	0.695672
778	0.645923	0.824855
779	0.614911	0.862989
780	0.582988	0.869566
781	0.555159	0.869566
782	0.544861	0.851817
783	0.535524	0.642583
784	0.511338	0.541987
785	0.489074	0.276531
786	0.458275	0.207613
787	0.361572	0
788	0.255613	0
789	0.211083	0
790	0.194192	0
791	0.180438	0
792	0.18565	0
793	0.230645	0
794	0.239816	0
795	0.179496	0
796	0.122345	0
797	0.109277	0
798	0.0958877	0
799	0.07322	0
800	0.06546	0.0533766
801	0.0638507	0.579159
802	0.0727293	0.0595205
803	0.0799627	0.24255
804	0.109333	0.316733
805	0.13724	0.0859272
806	0.112544	0.0835102
807	0.140033	0.0818631
808	0.168361	0.282414
809	0.187613	0.128629
810	0.237941	0.0782386
811	0.319713	0
812	0.382908	0
813	0.417403	0
814	0.431898	0
815	0.451447	0
816	0.43178	0
817	0.477334	0
818	0.562077	0
819	0.583521	0
820	0.550109	0
821	0.519505	0
822	0.44935	0
823	0.270734	0
824	0.132132	0.0307416
825	0.075476	0.262562
826	0.102616	0.303773
827	0.265193	0.46137
828	0.514031	0.405844
829	0.654295	0.564881
830	0.722563	0.798097
831	0.577997	0.644827
832	0.739254	0.570328
833	0.960045	0.541714
834	0.964688	0.212086
835	0.957188	0
836	0.949271	0
837	0.928363	0
838	0.913014	0
839	0.900744	0
840	0.842556	0
841	0.777219	0
842	0.690434	0
843	0.618391	0
844	0.518885	0
845	0.382562	0
846	0.254558	0
847	0.200771	0
848	0.271911	0.0271291
849	0.481247	0.556742
850	0.589451	0.0212323
851	0.519427	0.042668
852	0.484973	0.0736659
853	0.497074	0.0524522
854	0.483716	0.0631464
855	0.549775	0.116959
856	0.497826	0.146645
857	0.407066	0.0279397
858	0.33156	0.0182494
859	0.267436	0
860	0.209996	0
861	0.171884	0
862	0.147046	0
863	0.143774	0
864	0.16257	0
865	0.231261	0
866	0.347502	0
867	0.462148	0
868	0.443665	0
869	0.35003	0
870	0.271722	0
871	0.222018	0
872	0.15199	0.100449
873	0.089978	0.676109
874	0.0667577	0.869531
875	0.069937	0.869566
876	0.0768517	0.869566
877	0.0988957	0.869566
878	0.121437	0.869566
879	0.0895283	0.869566
880	0.0474387	0.869566
881	0.01709	0.816853
882	0.000741333	0.58682
883	4e-05	0
884	1.33333e-05	0
885	3.8e-05	0
886	6.5e-05	0
887	5.86667e-05	0
888	0.000586667	0
889	0.042196	0
890	0.136407	0
891	0.180931	0
892	0.164245	0
893	0.135716	0
894	0.121236	0
895	0.117328	0
896	0.1263	0.0474239
897	0.164892	0.647497
898	0.184614	0.818798
899	0.163946	0.817856
900	0.147831	0.860941
901	0.143943	0.821883
902	0.144008	0.856413
903	0.178371	0.840619
904	0.158406	0.810977
905	0.119696	0.747998
906	0.0712643	0.548908
907	0.054843	0
908	0.096125	0
909	0.148611	0
910	0.171993	0
911	0.140116	0
912	0.066168	0
913	0.0302377	0
914	0.00826967	0
915	0.017643	0
916	0.0652093	0
917	0.142185	0
918	0.231255	0
919	0.316343	0
920	0.3817	0.0732909
921	0.412777	0.646216
922	0.448807	0.24925
923	0.519437	0.172917
924	0.593167	0.309652
925	0.62902	0.286983
926	0.664627	0.225653
927	0.556797	0.327017
928	0.180258	0.219927
929	0.28735	0.527216
930	0.502716	0.47867
931	0.576096	0
932	0.562076	0
933	0.531963	0
934	0.562357	0
935	0.598084	0
936	0.52007	0
937	0.50699	0
938	0.564705	0
939	0.62389	0
940	0.672929	0
941	0.706693	0
942	0.717752	0
943	0.706217	0
944	0.670001	0.0010215
945	0.624621	0.230397
946	0.580387	0.0377197
947	0.537602	0.0886173
948	0.49242	0.152751
949	0.440956	0.195667
950	0.407235	0.43022
951	0.305444	0.412248
952	0.086569	0.482195
953	0.0855363	0.671742
954	0.187655	0.330241
955	0.313932	0
956	0.409311	0
957	0.477515	0
958	0.48021	0
959	0.394527	0
960	0.33238	0
961	0.305314	0
962	0.292609	0
963	0.280695	0
964	0.235421	0
965	0.210317	0
966	0.237191	0
967	0.30783	0
968	0.374125	0.00103195
969	0.329913	0.00698869
970	0.283153	0.0161652
971	0.286505	0.0479306
972	0.326716	0.22258
973	0.385978	0.474545
974	0.412364	0.0734764
975	0.352553	0.137104
976	0.220362	0.204497
977	0.106386	0.0539327
978	0.0390773	0.0225602
979	0.002516	0
980	0.000443667	0
981	7.4e-05	0
982	2.73333e-05	0
983	0.00253533	0
984	0.148462	0
985	0.403415	0
986	0.461226	0
987	0.466819	0
988	0.420244	0
989	0.358714	0
990	0.316371	0
991	0.298092	0
992	0.305426	0.00109056
993	0.318823	0.00683262
994	0.338654	0.00406406
995	0.385708	0.00621925
996	0.440332	0.0116632
997	0.406248	0.0444992
998	0.313883	0.0629116
999	0.248485	0.0519809
1000	0.211454	0.0281789
1001	0.192506	0.0260908
1002	0.172762	0.00821908
1003	0.143948	0
1004	0.123168	0
1005	0.105991	0
1006	0.098708	0
1007	0.103234	0
1008	0.103987	0
1009	0.0933573	0
1010	0.0636407	0
1011	0.033502	0
1012	0.0144437	0
1013	0.0115217	0
1014	0.0147283	0
1015	0.0192973	0
1016	0.0251033	0.00138185
1017	0.0394383	0.0161539
1018	0.057967	0.00727989
1019	0.0977377	0.223773
1020	0.170728	0.257436
1021	0.268164	0.685739
1022	0.430762	0.857861
1023	0.410387	0.869566
1024	0.393579	0.856517
1025	0.459423	0.78625
1026	0.458526	0.601522
1027	0.38609	0
1028	0.327833	0
1029	0.290864	0
1030	0.274755	0
1031	0.251574	0
1032	0.17581	0
1033	0.0992137	0
1034	0.053511	0
1035	0.040914	0
1036	0.0507483	0
1037	0.0928253	0
1038	0.200033	0
1039	0.338639	0
1040	0.446342	0.150824
1041	0.528829	0.744742
1042	0.593454	0.857803
1043	0.648809	0.869566
1044	0.708316	0.869566
1045	0.760036	0.869566
1046	0.791852	0.869566
1047	0.643285	0.865203
1048	0.373806	0.838403
1049	0.505427	0.787202
1050	0.453133	0.602522
1051	0.430192	0
1052	0.482936	0
1053	0.559439	0
1054	0.632296	0
1055	0.623646	0
1056	0.482928	0
1057	0.262529	0
1058	0.089097	0
1059	0.0396123	0
1060	0.0626283	0
1061	0.31911	0
1062	0.651721	0
1063	0.827542	0
1064	0.885107	0.136876
1065	0.903655	0.716714
1066	0.911367	0.832822
1067	0.91215	0.869566
1068	0.916664	0.869566
1069	0.925164	0.869566
1070	0.918509	0.869566
1071	0.800366	0.869566
1072	0.667751	0.859892
1073	0.742275	0.805114
1074	0.731505	0.615202
1075	0.736224	0
1076	0.654816	0
1077	0.546564	0
1078	0.419327	0
1079	0.375417	0
1080	0.550557	0
1081	0.800974	0
1082	0.801306	0
1083	0.712768	0
1084	0.604489	0
1085	0.497818	0
1086	0.403419	0
1087	0.367992	0
1088	0.414928	0.114696
1089	0.519516	0.433875
1090	0.640858	0.517981
1091	0.723115	0.477731
1092	0.759675	0.405184
1093	0.771725	0.300839
1094	0.754616	0.219939
1095	0.504758	0.171575
1096	0.324971	0.332908
1097	0.258076	0.37487
1098	0.164347	0.34587
1099	0.131963	0
1100	0.188128	0
1101	0.277451	0
1102	0.276508	0
1103	0.187222	0
1104	0.080698	0
1105	0.0140453	0
1106	0.0160033	0
1107	0.164976	0
1108	0.486872	0
1109	0.63669	0
1110	0.594481	0
1111	0.517503	0
1112	0.458527	0.00578811
1113	0.455157	0.0582308
1114	0.502579	0.0730655
1115	0.518026	0.211147
1116	0.492472	0.440233
1117	0.439614	0.560203
1118	0.378726	0.81088
1119	0.228192	0.621245
1120	0.0752323	0.546294
1121	0.0368807	0.53242
1122	0.0421087	0.402945
1123	0.0626293	0
1124	0.077286	0
1125	0.082973	0
1126	0.0636577	0
1127	0.033239	0
1128	0.0395373	0
1129	0.13945	0
1130	0.246732	0
1131	0.338678	0
1132	0.388904	0
1133	0.368011	0
1134	0.299249	0
1135	0.282504	0
1136	0.356407	0.0129096
1137	0.483276	0.378005
1138	0.659749	0.157498
1139	0.799099	0.369138
1140	0.841612	0.83227
1141	0.834815	0.830952
1142	0.807434	0.69955
1143	0.594513	0.691611
1144	0.506441	0.745689
1145	0.865558	0.7259
1146	0.757748	0.55475
1147	0.584189	0
1148	0.432194	0
1149	0.336169	0
1150	0.273404	0
1151	0.248308	0
1152	0.326496	0
1153	0.566222	0
1154	0.666997	0
1155	0.664293	0
1156	0.645725	0
1157	0.589509	0
1158	0.492911	0
1159	0.424818	0
1160	0.403429	0.00212425
1161	0.418553	0.0112468
1162	0.44634	0.0448908
1163	0.484371	0.0320462
1164	0.52493	0.0607983
1165	0.535712	0.0646741
1166	0.501877	0.0544123
1167	0.26338	0.07875
1168	0.189232	0.0535561
1169	0.311823	0.0170228
1170	0.275434	0.00955172
1171	0.23017	0
1172	0.264622	0
1173	0.318817	0
1174	0.324927	0
1175	0.262515	0
1176	0.16414	0
1177	0.0836323	0
1178	0.0356153	0
1179	0.0384863	0
1180	0.0885283	0
1181	0.159437	0
1182	0.175277	0
1183	0.131943	0
1184	0.079382	0.00107308
1185	0.053698	0.00498245
1186	0.0557193	0.00841825
1187	0.0792963	0.0239823
1188	0.116489	0.046793
1189	0.160048	0.086772
1190	0.216312	0.072382
1191	0.199296	0.0539217
1192	0.091635	0.0361492
1193	0.222993	0.0806942
1194	0.38321	0.106422
1195	0.470721	0
1196	0.536689	0
1197	0.600706	0
1198	0.634234	0
1199	0.64331	0
1200	0.607149	0
1201	0.604965	0
1202	0.621154	0
1203	0.622247	0
1204	0.545632	0
1205	0.489705	0
1206	0.582983	0
1207	0.670618	0
1208	0.709368	0.0013706
1209	0.727201	0.0186203
1210	0.722575	0.0234264
1211	0.734468	0.0437475
1212	0.764321	0.109056
1213	0.782413	0.117017
1214	0.887774	0.130295
1215	0.812395	0.116175
1216	0.983467	0.270475
1217	0.989118	0.175762
1218	0.982946	0.265398
1219	0.969813	0
1220	0.949756	0
1221	0.915813	0
1222	0.851849	0
1223	0.76342	0
1224	0.643296	0
1225	0.614917	0
1226	0.648111	0
1227	0.627334	0
1228	0.501214	0
1229	0.285697	0
1230	0.121126	0
1231	0.052796	0
1232	0.0305767	0.209289
1233	0.0489223	0.645908
1234	0.0953943	0.829181
1235	0.162273	0.84297
1236	0.260543	0.852127
1237	0.397209	0.838623
1238	0.536301	0.822461
1239	0.452794	0.809777
1240	0.803405	0.79117
1241	0.86299	0.743845
1242	0.816339	0.588408
1243	0.721648	0
1244	0.644784	0
1245	0.601929	0
1246	0.553621	0
1247	0.415875	0
1248	0.306384	0
1249	0.268145	0
1250	0.242869	0
1251	0.278665	0
1252	0.264873	0
1253	0.239473	0
1254	0.222393	0
1255	0.254587	0
1256	0.297087	0.153019
1257	0.344375	0.62307
1258	0.412745	0.780755
1259	0.423322	0.787919
1260	0.363115	0.858445
1261	0.282966	0.857527
1262	0.200628	0.775216
1263	0.115606	0.813862
1264	0.0367003	0.506305
1265	0.0268047	0.622948
1266	0.0424827	0.185773
1267	0.063772	0.00102386
1268	0.078605	0
1269	0.0857213	0
1270	0.087482	0
1271	0.081149	0
1272	0.075313	0
1273	0.131879	0
1274	0.240311	0
1275	0.343329	0
1276	0.355937	0
1277	0.315644	0
1278	0.301757	0
1279	0.316346	0
1280	0.333452	0.00134822
1281	0.370581	0.0253581
1282	0.388898	0.070378
1283	0.356952	0.0359575
1284	0.341197	0.0531244
1285	0.367996	0.0631673
1286	0.422138	0.0204641
1287	0.297075	0.0841814
1288	0.187155	0.0770091
1289	0.12807	0.0185558
1290	0.090944	0.0787602
1291	0.089589	0.000994503
1292	0.0937403	0
1293	0.082696	0
1294	0.0683557	0
1295	0.048273	0
1296	0.0540343	0
1297	0.164825	0
1298	0.344065	0
1299	0.497827	0
1300	0.553803	0
1301	0.540535	0
1302	0.447632	0
1303	0.359007	0
1304	0.341196	0.0117433
1305	0.255813	0.0647272
1306	0.160616	0.200752
1307	0.0931457	0.308978
1308	0.063801	0.613981
1309	0.0530357	0.600998
1310	0.0435833	0.642817
1311	0.0239533	0.544538
1312	0.0302303	0.581103
1313	0.0400777	0.548298
1314	0.033865	0.47327
1315	0.0332337	0.0795478
1316	0.037838	0
1317	0.032207	0
1318	0.0189663	0
1319	0.009194	0
1320	0.018727	0
1321	0.0949663	0
1322	0.210017	0
1323	0.413834	0
1324	0.592022	0
1325	0.617922	0
1326	0.594429	0
1327	0.556798	0
1328	0.492424	0.273327
1329	0.415125	0.362116
1330	0.329883	0.206548
1331	0.262815	0.365442
1332	0.219963	0.869566
1333	0.166956	0.869566
1334	0.103991	0.869566
1335	0.024852	0.852948
1336	0.00476533	0.512262
1337	0.005562	0.620444
1338	0.00118467	0.429275
1339	0.000243	0.0612666
1340	0.000112667	0
1341	5e-05	0
1342	0.00855667	0
1343	0.0549707	0
1344	0.218577	0
1345	0.403413	0
1346	0.355065	0
1347	0.201736	0
1348	0.11023	0
1349	0.0766	0
1350	0.0649597	0
1351	0.0993283	0
1352	0.224064	0.363891
1353	0.409849	0.808931
1354	0.577791	0.869566
1355	0.682439	0.869566
1356	0.707207	0.869566
1357	0.693399	0.869566
1358	0.674082	0.869566
1359	0.607559	0.869566
1360	0.42199	0.869566
1361	0.203688	0.86802
1362	0.071549	0.732869
1363	0.0213793	0.0991792
1364	0.00607433	0
1365	0.003562	0
1366	0.00298967	0
1367	0.00133033	0
1368	8.33333e-05	0
1369	0.0309183	0
1370	0.124671	0
1371	0.170813	0
1372	0.224023	0
1373	0.280715	0
1374	0.310243	0
1375	0.315818	0
1376	0.302971	0.414428
1377	0.284369	0.798345
1378	0.252559	0.869566
1379	0.234155	0.869566
1380	0.246	0.869566
1381	0.262528	0.869566
1382	0.227068	0.869566
1383	0.228127	0.869566
1384	0.249076	0.863339
1385	0.235596	0.804084
1386	0.240026	0.661772
1387	0.251496	0.0848341
1388	0.262545	0
1389	0.290103	0
1390	0.287868	0
1391	0.267826	0
1392	0.151996	0
1393	0.0723213	0
1394	0.0763613	0
1395	0.233344	0
1396	0.408021	0
1397	0.514033	0
1398	0.607998	0
1399	0.686942	0
1400	0.737601	0.138864
1401	0.768006	0.756484
1402	0.803634	0.83435
1403	0.821686	0.857653
1404	0.807736	0.864861
1405	0.786301	0.86133
1406	0.750032	0.857267
1407	0.437648	0.800895
1408	0.43959	0.575761
1409	0.609864	0.430991
1410	0.677525	0.249467
1411	0.718378	0.0127053
1412	0.742412	0
1413	0.738038	0
1414	0.675254	0
1415	0.559437	0
1416	0.365428	0
1417	0.193661	0
1418	0.08354	0
1419	0.0346007	0
1420	0.0413987	0
1421	0.0658633	0
1422	0.099101	0
1423	0.14398	0
1424	0.189149	0.0234102
1425	0.222095	0.017428
1426	0.24057	0.0611239
1427	0.237676	0.328912
1428	0.224025	0.440859
1429	0.211517	0.502614
1430	0.22408	0.626552
1431	0.143832	0.667312
1432	0.042574	0.595156
1433	0.0360947	0.668675
1434	0.0432	0.436894
1435	0.059797	0.00940267
1436	0.0988977	0
1437	0.188291	0
1438	0.332409	0
1439	0.455816	0
1440	0.54609	0
1441	0.684782	0
1442	0.769777	0
1443	0.798322	0
1444	0.782375	0
1445	0.732398	0
1446	0.650019	0
1447	0.491127	0
1448	0.367975	0.00727644
1449	0.35778	0.0102486
1450	0.349981	0.0665956
1451	0.294682	0.181183
1452	0.284929	0.0450959
1453	0.245203	0.346917
1454	0.172025	0.533058
1455	0.124643	0.459816
1456	0.144171	0.37655
1457	0.125006	0.0513012
1458	0.0636567	0.0280911
1459	0.033671	0.00180014
1460	0.100472	0
1461	0.235413	0
1462	0.276066	0
1463	0.252615	0
1464	0.21006	0
1465	0.291188	0
1466	0.370606	0
1467	0.437839	0
1468	0.415551	0
1469	0.30788	0
1470	0.262536	0
1471	0.273255	0
1472	0.258102	0.00468453
1473	0.249945	0.00840216
1474	0.286604	0.019667
1475	0.350575	0.0226358
1476	0.385759	0.0798875
1477	0.358991	0.0896103
1478	0.306519	0.107491
1479	0.237189	0.388978
1480	0.15089	0.0830136
1481	0.0942653	0.0224539
1482	0.0522667	0.0226231
1483	0.0164967	0.00182536
1484	0.00485	0
1485	0.005514	0
1486	0.01358	0
1487	0.024343	0
1488	0.04349	0
1489	0.0751797	0
1490	0.110932	0
1491	0.137107	0
1492	0.135733	0
1493	0.11806	0
1494	0.105047	0
1495	0.0987617	0
1496	0.0970373	0.046197
1497	0.084333	0.0367869
1498	0.070302	0.0315737
1499	0.0549817	0.111686
1500	0.0483023	0.206206
1501	0.0642573	0.0665237
1502	0.0802513	0.077078
1503	0.0619947	0.0812444
1504	0.040386	0.236509
1505	0.017548	0.321088
1506	0.00577	0.590034
1507	0.00188767	0.071837
1508	0.00414033	0
1509	0.00641533	0
1510	0.00861667	0
1511	0.0275457	0
1512	0.107459	0
1513	0.384714	0
1514	0.630965	0
1515	0.672927	0
1516	0.623167	0
1517	0.573245	0
1518	0.508879	0
1519	0.414756	0
1520	0.349887	0.465322
1521	0.297164	0.76077
1522	0.269379	0.835178
1523	0.282527	0.859692
1524	0.367122	0.867069
1525	0.523463	0.862934
1526	0.563902	0.85952
1527	0.430661	0.855498
1528	0.704217	0.837214
1529	0.800678	0.786522
1530	0.799554	0.659252
1531	0.847678	0.117623
1532	0.876498	0
1533	0.880175	0
1534	0.871037	0
1535	0.878256	0
1536	0.880194	0
1537	0.830143	0
1538	0.768532	0
1539	0.720457	0
1540	0.557986	0
1541	0.410095	0
1542	0.312938	0
1543	0.198523	0
1544	0.11359	0.439764
1545	0.0566803	0.762112
1546	0.029083	0.841994
1547	0.0418103	0.869566
1548	0.0636683	0.869566
1549	0.0657207	0.869566
1550	0.0534963	0.86602
1551	0.0241537	0.859605
1552	0.0107897	0.843084
1553	0.003575	0.751605
1554	0.000173	0.378505
1555	5.7e-05	0.0212089
1556	0.000353	0
1557	0.00709467	0
1558	0.015309	0
1559	0.035602	0
1560	0.106517	0
1561	0.511087	0
1562	0.817489	0
1563	0.86021	0
1564	0.851912	0
1565	0.8111	0
1566	0.740318	0
1567	0.685212	0
1568	0.594056	0.00740845
1569	0.493608	0.0121578
1570	0.458529	0.0362748
1571	0.450257	0.0939584
1572	0.492423	0.297686
1573	0.545298	0.389298
1574	0.568397	0.838428
1575	0.50514	0.841911
1576	0.477502	0.825159
1577	0.502892	0.784602
1578	0.477495	0.641283
1579	0.389945	0.10046
1580	0.351641	0
1581	0.393938	0
1582	0.445753	0
1583	0.417094	0
1584	0.400545	0
1585	0.608476	0
1586	0.725599	0
1587	0.751306	0
1588	0.722564	0
1589	0.646058	0
1590	0.577788	0
1591	0.44635	0
1592	0.296294	0.00618811
1593	0.273421	0.0258873
1594	0.345269	0.0706873
1595	0.370904	0.235008
1596	0.501573	0.311419
1597	0.727747	0.537872
1598	0.844402	0.27185
1599	0.89254	0.0765495
1600	0.861011	0.158455
1601	0.807347	0.0662728
1602	0.749656	0.115005
1603	0.663644	0.00588487
1604	0.560427	0
1605	0.465304	0
1606	0.381817	0
1607	0.30545	0
1608	0.252667	0
1609	0.18122	0
1610	0.172524	0
1611	0.188102	0
1612	0.243317	0
1613	0.299706	0
1614	0.319062	0
1615	0.36801	0
1616	0.351987	0.00530286
1617	0.273236	0.00410014
1618	0.198048	0.00738234
1619	0.167672	0.0198052
1620	0.143032	0.0472078
1621	0.159016	0.115292
1622	0.153533	0.0912319
1623	0.147665	0.0930237
1624	0.160989	0.12343
1625	0.173379	0.226263
1626	0.149013	0.101889
1627	0.0990833	0.00942858
1628	0.0590523	0
1629	0.031936	0
1630	0.016453	0
1631	0.00996967	0
1632	0.00622067	0
1633	0.00420367	0
1634	0.00419667	0
1635	0.0186837	0
1636	0.0520637	0
1637	0.0988013	0
1638	0.140354	0
1639	0.131152	0
1640	0.125685	0.214328
1641	0.214978	0.0572378
1642	0.271069	0.725612
1643	0.23546	0.7813
1644	0.186499	0.792733
1645	0.165966	0.769673
1646	0.162587	0.793894
1647	0.0719213	0.746302
1648	0.0339577	0.642145
1649	0.0261443	0.587441
1650	0.0310557	0.334705
1651	0.035568	0.101726
1652	0.0391783	0
1653	0.0472533	0
1654	0.059112	0
1655	0.0696833	0
1656	0.0850583	0
1657	0.226169	0
1658	0.51028	0
1659	0.621159	0
1660	0.642527	0
1661	0.617364	0
1662	0.579213	0
1663	0.576308	0
1664	0.613088	0.0224028
1665	0.666549	0.0857866
1666	0.679192	0.142403
1667	0.691126	0.445566
1668	0.72569	0.799012
1669	0.759488	0.779637
1670	0.748104	0.791152
1671	0.55114	0.708111
1672	0.860361	0.564355
1673	0.957812	0.645036
1674	0.954964	0.138082
1675	0.940244	0.0348722
1676	0.925363	0
1677	0.914892	0
1678	0.893771	0
1679	0.844055	0
1680	0.725656	0
1681	0.598529	0
1682	0.595573	0
1683	0.666277	0
1684	0.769734	0
1685	0.807883	0
1686	0.855439	0
1687	0.96921	0
1688	0.981857	0.106459
1689	0.979777	0.419441
1690	0.963852	0.636533
1691	0.944317	0.280822
1692	0.925588	0.559958
1693	0.892478	0.553445
1694	0.854383	0.540358
1695	0.877943	0.452078
1696	0.867472	0.460167
1697	0.793577	0.273252
1698	0.667584	0.0639836
1699	0.523455	0.00349138
1700	0.396887	0
1701	0.307831	0
1702	0.258116	0
1703	0.22655	0
1704	0.194656	0
1705	0.177446	0
1706	0.152888	0
1707	0.11488	0
1708	0.0894453	0
1709	0.083255	0
1710	0.090938	0
1711	0.100366	0
1712	0.100036	0.0188886
1713	0.0988983	0.0363998
1714	0.119353	0.13814
1715	0.166676	0.135297
1716	0.229782	0.149347
1717	0.297064	0.159548
1718	0.310742	0.175045
1719	0.397521	0.199511
1720	0.687597	0.0950745
1721	0.677534	0.165492
1722	0.642608	0.0387272
1723	0.584058	0.00319092
1724	0.519561	0
1725	0.492403	0
1726	0.501116	0
1727	0.56307	0
1728	0.677511	0
1729	0.776586	0
1730	0.816659	0
1731	0.82469	0
1732	0.829987	0
1733	0.829823	0
1734	0.806854	0
1735	0.75202	0
1736	0.681162	0.00459519
1737	0.598712	0.0233513
1738	0.519418	0.0735598
1739	0.488521	0.0975895
1740	0.480216	0.213244
1741	0.454698	0.476314
1742	0.306579	0.248564
1743	0.113195	0.115642
1744	0.071125	0.0863347
1745	0.0551957	0.0256945
1746	0.0380307	0.0335688
1747	0.0226577	0.010598
1748	0.0110017	0
1749	0.00800033	0
1750	0.004885	0
1751	0.003815	0
1752	0.010583	0
1753	0.0706117	0
1754	0.202297	0
1755	0.344005	0
1756	0.480218	0
1757	0.514042	0
1758	0.528825	0
1759	0.537105	0
1760	0.439096	0.360312
1761	0.212949	0.0158791
1762	0.062855	0.0137566
1763	0.0257773	0.0257887
1764	0.0338623	0.0484872
1765	0.0693057	0.0934898
1766	0.133216	0.131801
1767	0.182886	0.110056
1768	0.621175	0.0711887
1769	0.86747	0.0597814
1770	0.911729	0.0326927
1771	0.924809	0.00183002
1772	0.932966	0
1773	0.943306	0
1774	0.938551	0
1775	0.917454	0
1776	0.882511	0
1777	0.821244	0
1778	0.824669	0
1779	0.864934	0
1780	0.897588	0
1781	0.893072	0
1782	0.881185	0
1783	0.896506	0
1784	0.945701	0.00894539
1785	0.972779	0.0416203
1786	0.948623	0.155254
1787	0.927922	0.159117
1788	0.895957	0.291831
1789	0.873934	0.330544
1790	0.891035	0.245791
1791	0.953833	0.517391
1792	0.971611	0.382252
1793	0.968412	0.22977
1794	0.958743	0.432017
1795	0.952486	0.0359503
1796	0.957846	0
1797	0.960803	0
1798	0.956838	0
1799	0.95858	0
1800	0.965247	0
1801	0.934772	0
1802	0.876692	0
1803	0.771502	0
1804	0.643316	0
1805	0.54486	0
1806	0.389008	0
1807	0.210778	0
1808	0.103211	0.428122
1809	0.0428643	0.576502
1810	0.015128	0.183427
1811	0.0152607	0.0594189
1812	0.0267587	0.113748
1813	0.0658353	0.280483
1814	0.12866	0.52748
1815	0.0988923	0.459934
1816	0.114261	0.2954
1817	0.11157	0.470675
1818	0.0861377	0.429794
1819	0.084535	0.00378019
1820	0.13597	0
1821	0.252603	0
1822	0.407285	0
1823	0.556797	0
1824	0.648143	0
1825	0.77521	0
1826	0.890278	0
1827	0.927453	0
1828	0.936349	0
1829	0.934183	0
1830	0.932208	0
1831	0.932611	0
1832	0.935945	0.156512
1833	0.93555	0.144725
1834	0.920021	0.194216
1835	0.880217	0.316445
1836	0.871024	0.33163
1837	0.875225	0.219369
1838	0.82205	0.338214
1839	0.533265	0.264816
1840	0.709496	0.28338
1841	0.904528	0.262016
1842	0.914078	0.0105853
1843	0.910282	0.013526
1844	0.897601	0
1845	0.880072	0
1846	0.844312	0
1847	0.801365	0
1848	0.740936	0
1849	0.714401	0
1850	0.758448	0
1851	0.778666	0
1852	0.790547	0
1853	0.80226	0
1854	0.836285	0
1855	0.857672	0
1856	0.845961	0.187602
1857	0.759565	0.0268891
1858	0.629537	0.0299417
1859	0.485869	0.0983287
1860	0.439598	0.110875
1861	0.43554	0.3881
1862	0.400801	0.551722
1863	0.4549	0.702533
1864	0.321586	0.729631
1865	0.170519	0.641364
1866	0.078341	0.583697
1867	0.0319447	0.190183
1868	0.0101343	0
1869	0.0107453	0
1870	0.0148667	0
1871	0.0213273	0
1872	0.0330357	0
1873	0.0936007	0
1874	0.178226	0
1875	0.188388	0
1876	0.185472	0
1877	0.217743	0
1878	0.260346	0
1879	0.299885	0
1880	0.320245	0.418698
1881	0.280666	0.0338309
1882	0.247993	0.00771892
1883	0.241178	0.014808
1884	0.272704	0.0357889
1885	0.316299	0.147015
1886	0.273282	0.222413
1887	0.173117	0.225337
1888	0.35051	0.128668
1889	0.368487	0.520202
1890	0.315406	0.671461
1891	0.271384	0.208109
1892	0.23197	0
1893	0.227973	0
1894	0.250391	0
1895	0.288816	0
1896	0.368893	0
1897	0.62672	0
1898	0.826463	0
1899	0.865542	0
1900	0.857633	0
1901	0.838033	0
1902	0.833919	0
1903	0.806877	0
1904	0.757042	0.544269
1905	0.678546	0.0324139
1906	0.603188	0.0398673
1907	0.582987	0.0282389
1908	0.593105	0.0866381
1909	0.603768	0.0414897
1910	0.493349	0.0560605
1911	0.252125	0.162345
1912	0.308218	0.0337656
1913	0.463967	0.0280489
1914	0.512855	0.304784
1915	0.59194	0.113946
1916	0.645878	0
1917	0.687644	0
1918	0.655698	0
1919	0.547521	0
1920	0.373179	0
1921	0.203504	0
1922	0.105949	0
1923	0.0704263	0
1924	0.0457857	0
1925	0.0328933	0
1926	0.0556523	0
1927	0.131644	0
1928	0.213523	0.182658
1929	0.250404	0.0218495
1930	0.250393	0.0298386
1931	0.220118	0.0583178
1932	0.220422	0.103054
1933	0.216205	0.215995
1934	0.188483	0.372044
1935	0.192252	0.448966
1936	0.171862	0.26277
1937	0.14318	0.0497998
1938	0.102645	0.08525
1939	0.0595123	0.0468798
1940	0.030496	0
1941	0.0114397	0
1942	0.00214233	0
1943	0.004142	0
1944	0.0682347	0
1945	0.252588	0
1946	0.424366	0
1947	0.484126	0
1948	0.495989	0
1949	0.470726	0
1950	0.423092	0
1951	0.3904	0
1952	0.400792	0.54338
1953	0.428838	0.133068
1954	0.479107	0.430747
1955	0.662688	0.189828
1956	0.798543	0.198838
1957	0.796892	0.346264
1958	0.844144	0.470867
1959	0.806807	0.292058
1960	0.660737	0.176425
1961	0.516732	0.235445
1962	0.400805	0.46178
1963	0.283463	0.161608
1964	0.176746	0
1965	0.0994797	0
1966	0.045803	0
1967	0.0174807	0
1968	0.007524	0
1969	0.0152987	0
1970	0.093364	0
1971	0.243377	0
1972	0.356478	0
1973	0.365437	0
1974	0.336155	0
1975	0.301465	0
1976	0.273101	0.539856
1977	0.255876	0.741748
1978	0.24588	0.806366
1979	0.235472	0.833506
1980	0.224044	0.8396
1981	0.197479	0.840598
1982	0.103917	0.835564
1983	0.0835927	0.828453
1984	0.044045	0.805889
1985	0.00983933	0.757016
1986	0.00325167	0.658572
1987	0.009674	0.243358
1988	0.041559	0
1989	0.134809	0
1990	0.210354	0
1991	0.189171	0
1992	0.116207	0
1993	0.0742603	0
1994	0.128047	0
1995	0.278389	0
1996	0.461601	0
1997	0.558135	0
1998	0.577785	0
1999	0.58193	0
[truncated: 6,761 more rows]

## Sheet: Grid Inputs
Hour	Grid Sales Price - p_s(t) (in $/kWh)	Carbon Intensity of the Grid - CI_e(t) (in kg CO2 /kWh)
1	0.0193175	0.361845
2	0.020015	0.321227
3	0.018433	0.314004
4	0.017794	0.305593
5	0.017411	0.296925
6	0.017466	0.290509
7	0.019017	0.30141
8	0.021514	0.312081
9	0.023157	0.324424
10	0.024309	0.331418
11	0.024363	0.33086
12	0.024176	0.340094
13	0.02256	0.351193
14	0.021373	0.361918
15	0.020703	0.377745
16	0.020612	0.387206
17	0.020144	0.393961
18	0.024374	0.410721
19	0.035741	0.424628
20	0.033364	0.41174
21	0.028446	0.391607
22	0.026039	0.384434
23	0.023539	0.379063
24	0.022344	0.37016
25	0.021221	0.36188
26	0.020262	0.359179
27	0.018497	0.359312
28	0.018333	0.358177
29	0.018481	0.353575
30	0.021078	0.357044
31	0.024268	0.369247
32	0.040842	0.376437
33	0.044555	0.387892
34	0.036267	0.394408
35	0.03338	0.390511
36	0.029634	0.393183
37	0.026814	0.390926
38	0.024758	0.383327
39	0.023176	0.380513
40	0.02248	0.370628
41	0.022298	0.36758
42	0.025415	0.387988
43	0.046427	0.421769
44	0.046747	0.432025
45	0.035317	0.426196
46	0.032496	0.421447
47	0.02829	0.414136
48	0.02564	0.408379
49	0.0225965	0.40108
50	0.02087	0.392565
51	0.019191	0.384851
52	0.018719	0.373857
53	0.019575	0.365348
54	0.022036	0.366626
55	0.025756	0.377427
56	0.042966	0.39063
57	0.042404	0.397397
58	0.031774	0.391646
59	0.028413	0.393886
60	0.025813	0.392438
61	0.024146	0.387225
62	0.02302	0.385719
63	0.022123	0.377059
64	0.021453	0.370602
65	0.021511	0.371483
66	0.024106	0.392539
67	0.037159	0.442997
68	0.034703	0.450826
69	0.030418	0.426752
70	0.029212	0.40283
71	0.026661	0.389542
72	0.024062	0.379634
73	0.022432	0.369091
74	0.020541	0.356969
75	0.019673	0.345077
76	0.01953	0.340543
77	0.019972	0.341275
78	0.021457	0.346103
79	0.026254	0.359006
80	0.04019	0.381202
81	0.035444	0.402169
82	0.02873	0.401706
83	0.027285	0.397469
84	0.02441	0.39679
85	0.022587	0.389896
86	0.02137	0.380847
87	0.020234	0.370486
88	0.019709	0.363275
89	0.020159	0.361292
90	0.024308	0.380042
91	0.034268	0.439166
92	0.032277	0.453338
93	0.028335	0.431567
94	0.027098	0.417776
95	0.025244	0.405346
96	0.024631	0.39456
97	0.0235455	0.386364
98	0.021133	0.379933
99	0.019768	0.380736
100	0.019907	0.383118
101	0.020622	0.380385
102	0.022534	0.38725
103	0.027565	0.399978
104	0.043709	0.420408
105	0.038883	0.433273
106	0.028209	0.418315
107	0.024696	0.397732
108	0.023259	0.39081
109	0.021928	0.383624
110	0.021087	0.388617
111	0.019904	0.390568
112	0.019238	0.385912
113	0.019414	0.383095
114	0.022153	0.395949
115	0.034581	0.431992
116	0.030886	0.418795
117	0.02591	0.386142
118	0.024644	0.355131
119	0.022609	0.327426
120	0.021748	0.304603
121	0.019997	0.286545
122	0.017379	0.279347
123	0.016263	0.275595
124	0.016469	0.273994
125	0.016915	0.283917
126	0.018991	0.284487
127	0.022541	0.29096
128	0.032447	0.31584
129	0.029611	0.322691
130	0.025543	0.31916
131	0.022328	0.317059
132	0.020664	0.301289
133	0.019728	0.284528
134	0.01896	0.275162
135	0.018452	0.274071
136	0.017669	0.273692
137	0.018192	0.274787
138	0.021078	0.291059
139	0.033743	0.333848
140	0.03066	0.358691
141	0.027367	0.352801
142	0.025673	0.349746
143	0.022845	0.349934
144	0.02116	0.349274
145	0.019127	0.347612
146	0.019829	0.349983
147	0.018256	0.352682
148	0.018164	0.350206
149	0.018354	0.354303
150	0.019847	0.363668
151	0.02294	0.373452
152	0.031473	0.388855
153	0.029999	0.401492
154	0.030195	0.401452
155	0.026189	0.397896
156	0.022171	0.402165
157	0.020315	0.404283
158	0.019046	0.400775
159	0.01837	0.395073
160	0.0173	0.390643
161	0.017547	0.394634
162	0.020772	0.409213
163	0.03075	0.443176
164	0.02922	0.436094
165	0.024572	0.415432
166	0.022434	0.402622
167	0.021295	0.385723
168	0.019599	0.366615
169	0.018026	0.361622
170	0.017558	0.360226
171	0.016465	0.364332
172	0.01616	0.367315
173	0.01636	0.36595
174	0.017655	0.367475
175	0.023326	0.371807
176	0.036041	0.38848
177	0.035619	0.402423
178	0.026829	0.389775
179	0.023857	0.37547
180	0.021363	0.367598
181	0.01963	0.369195
182	0.018585	0.372683
183	0.018032	0.369483
184	0.017424	0.366671
185	0.017554	0.361806
186	0.020273	0.372021
187	0.033985	0.412289
188	0.030328	0.41735
189	0.024336	0.396077
190	0.022217	0.376799
191	0.020971	0.359325
192	0.01943	0.342476
193	0.0182935	0.338685
194	0.017368	0.332857
195	0.016252	0.324607
196	0.016195	0.319199
197	0.016189	0.318699
198	0.017624	0.327738
199	0.019127	0.337628
200	0.028506	0.356391
201	0.028224	0.369075
202	0.023238	0.371742
203	0.021195	0.374111
204	0.020023	0.379989
205	0.019523	0.379324
206	0.018819	0.389989
207	0.018846	0.394271
208	0.018573	0.395329
209	0.019085	0.391666
210	0.021379	0.402769
211	0.036088	0.431684
212	0.035451	0.436156
213	0.027837	0.416346
214	0.025228	0.403614
215	0.02278	0.383738
216	0.019927	0.360739
217	0.018832	0.340541
218	0.017895	0.337215
219	0.016354	0.329403
220	0.016181	0.327685
221	0.016523	0.331299
222	0.017789	0.33677
223	0.02106	0.353697
224	0.029766	0.372218
225	0.029942	0.39061
226	0.026869	0.390839
227	0.026242	0.388584
228	0.024119	0.380681
229	0.021309	0.375219
230	0.019798	0.375833
231	0.019104	0.374283
232	0.01867	0.37124
233	0.019699	0.370268
234	0.023854	0.376907
235	0.040194	0.398982
236	0.034808	0.397941
237	0.027348	0.378705
238	0.024901	0.363698
239	0.022112	0.353099
240	0.020641	0.348347
241	0.0188685	0.33915
242	0.016354	0.332461
243	0.015209	0.328803
244	0.014817	0.331595
245	0.014916	0.335408
246	0.017138	0.340692
247	0.024093	0.349214
248	0.033626	0.365855
249	0.030903	0.376514
250	0.025031	0.372795
251	0.022842	0.371149
252	0.021672	0.380636
253	0.020064	0.380216
254	0.018276	0.372487
255	0.017764	0.361645
256	0.017329	0.353582
257	0.017921	0.357879
258	0.02137	0.377984
259	0.034972	0.401875
260	0.032645	0.401816
261	0.025295	0.390232
262	0.022971	0.381657
263	0.021029	0.371892
264	0.019439	0.361043
265	0.017643	0.351573
266	0.015481	0.341397
267	0.014788	0.337203
268	0.014936	0.332719
269	0.0156	0.333444
270	0.018334	0.339537
271	0.025471	0.345861
272	0.035992	0.358907
273	0.031073	0.370706
274	0.026317	0.370238
275	0.022612	0.361778
276	0.02133	0.354113
277	0.020316	0.353779
278	0.019239	0.355217
279	0.019279	0.357688
280	0.018995	0.367782
281	0.019465	0.380741
282	0.02255	0.40752
283	0.036194	0.457673
284	0.037988	0.481022
285	0.030448	0.475552
286	0.027794	0.468366
287	0.025774	0.461494
288	0.023721	0.452209
289	0.0222165	0.43464
290	0.02106	0.419802
291	0.020012	0.411173
292	0.019578	0.411218
293	0.019574	0.415069
294	0.021261	0.41979
295	0.027151	0.425727
296	0.037005	0.427421
297	0.036757	0.431299
298	0.031054	0.423521
299	0.027608	0.412358
300	0.024893	0.42013
301	0.022782	0.424004
302	0.021672	0.421769
303	0.020465	0.415858
304	0.019714	0.405199
305	0.019318	0.397837
306	0.021284	0.407711
307	0.033202	0.452389
308	0.035882	0.453352
309	0.028911	0.43416
310	0.026318	0.420633
311	0.02483	0.408196
312	0.023408	0.386706
313	0.022574	0.373477
314	0.021777	0.362256
315	0.020919	0.354241
316	0.021572	0.351545
317	0.023492	0.356154
318	0.025095	0.362622
319	0.028685	0.365882
320	0.039394	0.380555
321	0.036375	0.387953
322	0.032379	0.379575
323	0.02999	0.376984
324	0.028116	0.37331
325	0.026995	0.359467
326	0.025022	0.341993
327	0.023259	0.33114
328	0.022419	0.324342
329	0.022319	0.325841
330	0.026736	0.336085
331	0.038239	0.371855
332	0.037673	0.376321
333	0.032037	0.35548
334	0.029611	0.345887
335	0.027107	0.334259
336	0.024789	0.322318
337	0.022834	0.312474
338	0.028374	0.301559
339	0.024337	0.293407
340	0.025957	0.288006
341	0.027421	0.293506
342	0.034639	0.296632
343	0.051424	0.307467
344	0.107679	0.327015
345	0.127605	0.340137
346	0.108567	0.344327
347	0.057494	0.344967
348	0.042312	0.335842
349	0.033295	0.329137
350	0.030102	0.324539
351	0.026679	0.326053
352	0.025277	0.321421
353	0.025291	0.322409
354	0.028176	0.333087
355	0.042209	0.357252
356	0.043294	0.370805
357	0.035985	0.365677
358	0.03336	0.357739
359	0.030083	0.356817
360	0.031935	0.352741
361	0.0286985	0.347181
362	0.031645	0.347238
363	0.030877	0.349269
364	0.035016	0.353277
365	0.041202	0.361026
366	0.054859	0.371302
367	0.093311	0.379907
368	0.167085	0.393414
369	0.22168	0.405168
370	0.163869	0.402249
371	0.059992	0.396032
372	0.042794	0.402608
373	0.03638	0.402069
374	0.031714	0.398121
375	0.029502	0.395088
376	0.028519	0.391279
377	0.028866	0.396342
378	0.033691	0.412019
379	0.067759	0.444429
380	0.08036	0.453578
381	0.066797	0.446568
382	0.057169	0.440877
383	0.046888	0.436428
384	0.045326	0.429834
385	0.0382475	0.419711
386	0.031716	0.409853
387	0.030043	0.408252
388	0.03017	0.413722
389	0.031792	0.418064
390	0.037836	0.426822
391	0.058984	0.437975
392	0.199676	0.45298
393	0.211364	0.463026
394	0.085157	0.464272
395	0.037136	0.464871
396	0.033705	0.464518
397	0.029604	0.45684
398	0.027026	0.450648
399	0.025129	0.43726
400	0.023384	0.423844
401	0.02294	0.408578
402	0.026434	0.407816
403	0.039138	0.431479
404	0.037977	0.425073
405	0.031235	0.405268
406	0.028123	0.387774
407	0.025885	0.371156
408	0.024291	0.345327
409	0.0226295	0.318415
410	0.019661	0.306432
411	0.018811	0.294348
412	0.018966	0.282556
413	0.019637	0.284967
414	0.021197	0.289414
415	0.029949	0.297837
416	0.053999	0.307431
417	0.052782	0.319748
418	0.036849	0.314448
419	0.02857	0.314474
420	0.025409	0.29936
421	0.022594	0.290848
422	0.021321	0.288767
423	0.020011	0.289998
424	0.019419	0.292203
425	0.019705	0.293807
426	0.021665	0.298848
427	0.030645	0.331653
428	0.034037	0.348778
429	0.026239	0.328688
430	0.024274	0.311078
431	0.021758	0.296242
432	0.01993	0.281476
433	0.0181255	0.265357
434	0.015341	0.260202
435	0.01412	0.255426
436	0.014475	0.256509
437	0.015474	0.253521
438	0.017221	0.266274
439	0.020766	0.288753
440	0.028703	0.317715
441	0.02995	0.339975
442	0.026788	0.34817
443	0.023007	0.334584
444	0.021257	0.322317
445	0.020812	0.322237
446	0.020379	0.330896
447	0.01965	0.334384
448	0.019005	0.335129
449	0.019089	0.336039
450	0.021365	0.354506
451	0.034078	0.396723
452	0.037807	0.425935
453	0.030134	0.430272
454	0.027657	0.433103
455	0.02486	0.432631
456	0.023053	0.424127
457	0.020836	0.416322
458	0.019054	0.405705
459	0.018784	0.401496
460	0.018713	0.39676
461	0.019179	0.395165
462	0.021205	0.39465
463	0.026621	0.399934
464	0.038451	0.41047
465	0.038063	0.416257
466	0.033424	0.410912
467	0.028502	0.40973
468	0.025465	0.403951
469	0.024148	0.393491
470	0.022464	0.39315
471	0.02142	0.394153
472	0.020475	0.395352
473	0.0205	0.396432
474	0.022641	0.400987
475	0.030834	0.413016
476	0.033877	0.412675
477	0.029484	0.393877
478	0.027297	0.38269
479	0.023482	0.375939
480	0.019893	0.369286
481	0.0183975	0.355558
482	0.01739	0.350002
483	0.016765	0.350631
484	0.016441	0.358728
485	0.016965	0.372348
486	0.01846	0.380388
487	0.021251	0.390807
488	0.035304	0.402882
489	0.035808	0.410446
490	0.027538	0.406375
491	0.024469	0.400529
492	0.022882	0.383315
493	0.020959	0.373205
494	0.019574	0.360248
495	0.019093	0.350002
496	0.018222	0.336313
497	0.018192	0.325731
498	0.020576	0.329577
499	0.025191	0.356174
500	0.026463	0.377807
501	0.023201	0.367941
502	0.021882	0.358498
503	0.02047	0.346383
504	0.018424	0.335372
505	0.0177165	0.323429
506	0.016176	0.311432
507	0.014915	0.315925
508	0.014917	0.327911
509	0.016012	0.339028
510	0.018339	0.351229
511	0.021877	0.368201
512	0.032819	0.389653
513	0.035597	0.407776
514	0.029091	0.404644
515	0.02593	0.396975
516	0.0234	0.4003
517	0.021658	0.405964
518	0.020745	0.403166
519	0.020274	0.392472
520	0.019782	0.384285
521	0.02006	0.390752
522	0.023413	0.404529
523	0.033284	0.443006
524	0.037574	0.460899
525	0.02985	0.455878
526	0.026514	0.447447
527	0.024256	0.441245
528	0.022116	0.433411
529	0.021429	0.420785
530	0.020112	0.412864
531	0.01929	0.406153
532	0.019257	0.401323
533	0.019643	0.394222
534	0.020825	0.399865
535	0.023025	0.408901
536	0.035358	0.424052
537	0.035789	0.427606
538	0.03185	0.417004
539	0.027008	0.409619
540	0.024824	0.398091
541	0.022164	0.394756
542	0.020783	0.393908
543	0.019377	0.38792
544	0.018756	0.38243
545	0.018747	0.384644
546	0.021183	0.399817
547	0.029698	0.437299
548	0.034059	0.455423
549	0.02824	0.44593
550	0.026	0.427404
551	0.023331	0.41199
552	0.020821	0.393538
553	0.019767	0.376364
554	0.018413	0.36981
555	0.017633	0.374593
556	0.017759	0.374934
557	0.018124	0.377538
558	0.019542	0.389689
559	0.023591	0.403767
560	0.039256	0.420631
561	0.036851	0.433453
562	0.031056	0.442425
563	0.02754	0.443021
564	0.024487	0.436329
565	0.022714	0.41618
566	0.021424	0.405941
567	0.020395	0.402452
568	0.019844	0.39389
569	0.019653	0.384551
570	0.021489	0.387078
571	0.032123	0.412822
572	0.03272	0.427206
573	0.028787	0.411598
574	0.025556	0.397127
575	0.023586	0.387429
576	0.021036	0.381663
577	0.0196995	0.372724
578	0.017603	0.351056
579	0.01655	0.340737
580	0.016808	0.344922
581	0.017923	0.345486
582	0.019293	0.348122
583	0.022464	0.351473
584	0.036695	0.363575
585	0.033904	0.372694
586	0.027047	0.37405
587	0.024364	0.369215
588	0.022046	0.358166
589	0.02099	0.354862
590	0.019969	0.35651
591	0.01921	0.356208
592	0.018718	0.351803
593	0.018675	0.349032
594	0.020941	0.352429
595	0.032221	0.389204
596	0.034546	0.420565
597	0.027432	0.41175
598	0.024726	0.41056
599	0.022573	0.413265
600	0.020329	0.412409
601	0.0193515	0.407591
602	0.017517	0.407107
603	0.01701	0.406083
604	0.01739	0.404615
605	0.018076	0.408234
606	0.019371	0.419242
607	0.024248	0.430594
608	0.033755	0.439382
609	0.033584	0.450744
610	0.028268	0.451422
611	0.026408	0.447283
612	0.024054	0.447792
613	0.022346	0.446072
614	0.021	0.440513
615	0.020046	0.439454
616	0.019625	0.439328
617	0.019473	0.444418
618	0.021426	0.4463
619	0.031097	0.474218
620	0.03382	0.490548
621	0.029014	0.482252
622	0.027021	0.479758
623	0.024622	0.469025
624	0.022633	0.460491
625	0.0215425	0.447927
626	0.020629	0.431429
627	0.019241	0.418497
628	0.018262	0.405856
629	0.018259	0.388951
630	0.019153	0.374455
631	0.022425	0.379954
632	0.036089	0.390141
633	0.032639	0.39765
634	0.028204	0.396157
635	0.026906	0.394965
636	0.02399	0.392578
637	0.022432	0.384453
638	0.020668	0.381787
639	0.019745	0.377098
640	0.018705	0.368138
641	0.018776	0.359277
642	0.02204	0.359659
643	0.029529	0.396843
644	0.031903	0.408832
645	0.025923	0.381846
646	0.023515	0.365584
647	0.02204	0.348216
648	0.021238	0.328106
649	0.019296	0.310151
650	0.01795	0.296905
651	0.016305	0.291016
652	0.015994	0.288598
653	0.01665	0.290803
654	0.018687	0.301122
655	0.024256	0.323237
656	0.034251	0.35475
657	0.033131	0.376256
658	0.028182	0.371424
659	0.024374	0.360593
660	0.022053	0.350997
661	0.020271	0.334327
662	0.018378	0.317565
663	0.017583	0.306236
664	0.017028	0.295092
665	0.017349	0.293321
666	0.01952	0.306526
667	0.028283	0.347848
668	0.035388	0.375179
669	0.028009	0.371869
670	0.025683	0.365227
671	0.024653	0.362017
672	0.022492	0.360155
673	0.020601	0.34644
674	0.019936	0.345497
675	0.018929	0.350877
676	0.018858	0.361079
677	0.019714	0.371909
678	0.021595	0.374868
679	0.025855	0.378649
680	0.041106	0.394683
681	0.036681	0.403841
682	0.029707	0.395674
683	0.025911	0.395007
684	0.023627	0.387974
685	0.022323	0.379189
686	0.021089	0.375542
687	0.019889	0.370156
688	0.019335	0.363944
689	0.019102	0.360261
690	0.020827	0.375119
691	0.032749	0.415219
692	0.038007	0.4341
693	0.026913	0.420759
694	0.024072	0.400705
695	0.022134	0.37852
696	0.020329	0.362464
697	0.0183945	0.344612
698	0.016998	0.333517
699	0.016467	0.333012
700	0.016662	0.342036
701	0.017714	0.355893
702	0.019063	0.372925
703	0.022167	0.394682
704	0.034922	0.406261
705	0.035467	0.413208
706	0.029749	0.414872
707	0.026883	0.418997
708	0.025399	0.416495
709	0.022823	0.406942
710	0.02149	0.398436
711	0.020282	0.391995
712	0.019393	0.386551
713	0.019897	0.388471
714	0.022363	0.401495
715	0.03413	0.430748
716	0.037707	0.451082
717	0.030208	0.44184
718	0.02734	0.432471
719	0.024639	0.423924
720	0.021274	0.420226
721	0.019686	0.406742
722	0.019422	0.390623
723	0.017783	0.375357
724	0.017617	0.370317
725	0.018067	0.374816
726	0.020207	0.37483
727	0.025243	0.38621
728	0.041506	0.407681
729	0.043802	0.420574
730	0.036499	0.419039
731	0.031124	0.411682
732	0.028387	0.397813
733	0.025902	0.398474
734	0.023893	0.404553
735	0.022588	0.407136
736	0.022463	0.404337
737	0.02269	0.404095
738	0.026592	0.415295
739	0.043037	0.449837
740	0.046077	0.476597
741	0.034059	0.461458
742	0.030967	0.448817
743	0.025435	0.440785
744	0.022177	0.429395
745	0.019736	0.417505
746	0.016922	0.404542
747	0.015844	0.40131
748	0.016104	0.402153
749	0.017701	0.402251
750	0.019487	0.407609
751	0.024668	0.416325
752	0.036272	0.431622
753	0.034124	0.446108
754	0.031643	0.448368
755	0.031568	0.453218
756	0.030132	0.459958
757	0.028153	0.459293
758	0.025164	0.453707
759	0.024028	0.447097
760	0.024266	0.439391
761	0.024337	0.439651
762	0.028495	0.446191
763	0.039451	0.468995
764	0.040056	0.475454
765	0.030671	0.451123
766	0.027987	0.424319
767	0.024218	0.402251
768	0.020469	0.379164
769	0.017808	0.368294
770	0.015908	0.362248
771	0.015033	0.3575
772	0.014781	0.352535
773	0.015478	0.349497
774	0.017414	0.357308
775	0.022818	0.366163
776	0.033629	0.375958
777	0.030844	0.384188
778	0.027471	0.390257
779	0.024149	0.400694
780	0.022697	0.393246
781	0.021392	0.379649
782	0.020599	0.367878
783	0.020191	0.358319
784	0.019647	0.35727
785	0.019919	0.356769
786	0.022422	0.365331
787	0.027878	0.390359
788	0.03278	0.398564
789	0.025573	0.378958
790	0.023958	0.363673
791	0.022924	0.346816
792	0.020695	0.332359
793	0.0195745	0.31775
794	0.017652	0.312923
795	0.016476	0.31256
796	0.015728	0.312656
797	0.016108	0.31666
798	0.017293	0.327827
799	0.021648	0.343907
800	0.035921	0.360655
801	0.033219	0.374154
802	0.028041	0.376066
803	0.02588	0.37451
804	0.024098	0.365549
805	0.022847	0.357625
806	0.021898	0.34986
807	0.021428	0.341738
808	0.020898	0.334835
809	0.021171	0.322426
810	0.022897	0.320902
811	0.032518	0.348095
812	0.039064	0.369864
813	0.032034	0.346167
814	0.029485	0.327707
815	0.026941	0.317939
816	0.022521	0.303487
817	0.021324	0.290219
818	0.017747	0.278936
819	0.017115	0.274409
820	0.017079	0.279
821	0.017797	0.290115
822	0.020476	0.303974
823	0.029215	0.325535
824	0.062517	0.350217
825	0.05695	0.362186
826	0.041472	0.356301
827	0.030929	0.352224
828	0.025063	0.353677
829	0.023108	0.355275
830	0.021312	0.3579
831	0.020536	0.363503
832	0.019539	0.369623
833	0.019134	0.374229
834	0.0211	0.379154
835	0.028947	0.403356
836	0.034153	0.421969
837	0.028831	0.402325
838	0.027384	0.389166
839	0.026273	0.382539
840	0.023858	0.375867
841	0.0216315	0.365968
842	0.017904	0.360905
843	0.016688	0.361284
844	0.016792	0.37143
845	0.017543	0.384827
846	0.020101	0.396801
847	0.024756	0.411278
848	0.041558	0.430521
849	0.037522	0.44213
850	0.028761	0.432339
851	0.024049	0.42092
852	0.022372	0.419955
853	0.021298	0.410266
854	0.019959	0.395528
855	0.019164	0.383914
856	0.018475	0.376685
857	0.018378	0.372281
858	0.020458	0.381518
859	0.027493	0.409821
860	0.036214	0.428708
861	0.02634	0.395351
862	0.023462	0.366769
863	0.021178	0.356252
864	0.018736	0.349767
865	0.01668	0.335541
866	0.016057	0.324862
867	0.01523	0.324779
868	0.015224	0.324289
869	0.016263	0.33204
870	0.018214	0.341171
871	0.02261	0.358392
872	0.039599	0.378969
873	0.034703	0.387207
874	0.028053	0.377154
875	0.023928	0.369685
876	0.020794	0.368241
877	0.018986	0.353823
878	0.018121	0.333644
879	0.017037	0.309862
880	0.016241	0.291301
881	0.015981	0.287115
882	0.01839	0.296423
883	0.026389	0.336788
884	0.032126	0.386687
885	0.024139	0.382997
886	0.021356	0.370224
887	0.020324	0.365582
888	0.017872	0.354863
889	0.016022	0.33679
890	0.014115	0.321006
891	0.013076	0.310898
892	0.01296	0.306499
893	0.013476	0.30823
894	0.01498	0.315552
895	0.019232	0.336098
896	0.029294	0.363307
897	0.028463	0.382277
898	0.024848	0.37978
899	0.022235	0.372387
900	0.019231	0.363068
901	0.018075	0.349877
902	0.017592	0.344229
903	0.01749	0.345588
904	0.017085	0.342034
905	0.017448	0.340281
906	0.019435	0.342738
907	0.023919	0.375759
908	0.031525	0.400789
909	0.025477	0.388806
910	0.023418	0.381399
911	0.020497	0.367352
912	0.019479	0.351373
913	0.0165525	0.337059
914	0.014676	0.330775
915	0.013666	0.332771
916	0.013782	0.333258
917	0.015032	0.339759
918	0.0174	0.35047
919	0.021157	0.366374
920	0.034341	0.393914
921	0.032761	0.409761
922	0.026427	0.401703
923	0.022446	0.392892
924	0.020253	0.380717
925	0.019657	0.37251
926	0.018882	0.367609
927	0.018337	0.363076
928	0.01813	0.355637
929	0.019699	0.344983
930	0.021224	0.344903
931	0.029788	0.37572
932	0.034405	0.417259
933	0.026619	0.408772
934	0.023088	0.402068
935	0.020152	0.398767
936	0.018656	0.393028
937	0.018175	0.383886
938	0.016871	0.3842
939	0.016291	0.391
940	0.016241	0.39973
941	0.016582	0.40618
942	0.018288	0.411608
943	0.021941	0.418003
944	0.03571	0.423569
945	0.031073	0.429644
946	0.025724	0.41315
947	0.024909	0.398618
948	0.022791	0.392559
949	0.020672	0.38973
950	0.019772	0.387927
951	0.018885	0.386872
952	0.01867	0.383131
953	0.018783	0.378595
954	0.020252	0.379441
955	0.025742	0.402561
956	0.031384	0.417036
957	0.024027	0.39918
958	0.022314	0.388539
959	0.020221	0.380125
960	0.018553	0.377858
961	0.018026	0.375878
962	0.015465	0.372241
963	0.015204	0.376226
964	0.015319	0.38613
965	0.015177	0.397252
966	0.016564	0.406145
967	0.021872	0.412235
968	0.030698	0.420201
969	0.028885	0.42587
970	0.024292	0.419855
971	0.023196	0.413724
972	0.021826	0.41368
973	0.020757	0.417641
974	0.019886	0.420306
975	0.019506	0.421111
976	0.019148	0.421322
977	0.019413	0.421263
978	0.020799	0.424899
979	0.026849	0.439371
980	0.037253	0.460949
981	0.02694	0.461933
982	0.024711	0.456381
983	0.02299	0.450648
984	0.019401	0.437021
985	0.019027	0.420404
986	0.018455	0.407991
987	0.01642	0.399373
988	0.015832	0.394725
989	0.015951	0.396065
990	0.018173	0.399327
991	0.023542	0.40343
992	0.034683	0.411926
993	0.030711	0.415083
994	0.027586	0.404063
995	0.025039	0.395491
996	0.022568	0.389148
997	0.021324	0.378261
998	0.020633	0.36921
999	0.020917	0.368474
1000	0.020103	0.366987
1001	0.02104	0.36266
1002	0.022587	0.365915
1003	0.032675	0.382998
1004	0.039064	0.398475
1005	0.027652	0.39648
1006	0.024801	0.389296
1007	0.021367	0.385626
1008	0.0199	0.374925
1009	0.0222315	0.360973
1010	0.021785	0.345333
1011	0.020961	0.338192
1012	0.020961	0.334481
1013	0.02154	0.333518
1014	0.024605	0.337827
1015	0.037249	0.349321
1016	0.057132	0.36935
1017	0.050702	0.387268
1018	0.047331	0.395445
1019	0.038262	0.395959
1020	0.032913	0.386762
1021	0.02898	0.376288
1022	0.027725	0.370643
1023	0.026788	0.370421
1024	0.026029	0.373211
1025	0.027305	0.368979
1026	0.031678	0.372388
1027	0.047625	0.399543
1028	0.049996	0.42948
1029	0.039571	0.420322
1030	0.034853	0.403356
1031	0.030155	0.3898
1032	0.02668	0.378461
1033	0.0611715	0.367633
1034	0.062484	0.358646
1035	0.064797	0.358013
1036	0.0648	0.365618
1037	0.065135	0.369855
1038	0.079611	0.380164
1039	0.118068	0.394847
1040	0.238223	0.411864
1041	0.231586	0.422656
1042	0.229815	0.413647
1043	0.166708	0.411953
1044	0.143897	0.406929
1045	0.137249	0.403804
1046	0.127575	0.399868
1047	0.126141	0.393273
1048	0.12348	0.381359
1049	0.135117	0.368734
1050	0.171411	0.365428
1051	0.223884	0.376409
1052	0.233215	0.396099
1053	0.17918	0.380983
1054	0.118296	0.363527
1055	0.106643	0.349508
1056	0.094644	0.338297
1057	0.220141	0.325724
1058	0.217823	0.317997
1059	0.210029	0.317281
1060	0.209905	0.322332
1061	0.210375	0.328367
1062	0.261241	0.333858
1063	0.612113	0.346704
1064	0.623588	0.363853
1065	0.721309	0.37369
1066	0.521039	0.369046
1067	0.517117	0.372986
1068	0.420363	0.368463
1069	0.324355	0.359854
1070	0.314433	0.359043
1071	0.314458	0.354694
1072	0.313564	0.347036
1073	0.32236	0.341368
1074	0.581823	0.345595
1075	0.715596	0.370483
1076	0.644971	0.397552
1077	0.522544	0.372861
1078	0.41487	0.352023
1079	0.313947	0.34139
1080	0.283508	0.335314
1081	0.31873	0.331174
1082	0.343992	0.327927
1083	0.310762	0.327197
1084	0.422024	0.323404
1085	0.460603	0.327656
1086	0.761105	0.329507
1087	0.799875	0.337015
1088	0.773971	0.356205
1089	0.79666	0.366634
1090	0.793344	0.360725
1091	0.785892	0.35379
1092	0.792615	0.330625
1093	0.770244	0.325481
1094	0.764577	0.324774
1095	0.76396	0.3301
1096	0.696878	0.337876
1097	0.615311	0.343347
1098	0.767201	0.352452
1099	0.735044	0.36737
1100	0.816816	0.375727
1101	0.738482	0.368192
1102	0.71726	0.360978
1103	0.768817	0.357448
1104	0.715074	0.354498
1105	0.801573	0.355384
1106	0.760845	0.355678
1107	0.809566	0.35641
1108	0.809103	0.357885
1109	0.809734	0.359878
1110	0.810971	0.359492
1111	0.780811	0.364674
1112	0.770703	0.372489
1113	0.769226	0.381154
1114	0.768462	0.37801
1115	0.767991	0.375982
1116	0.766643	0.378418
1117	0.698726	0.374526
1118	0.615222	0.370756
1119	0.570816	0.368742
1120	0.57041	0.364231
1121	0.42163	0.360934
1122	0.614766	0.352081
1123	0.666679	0.355712
1124	0.676947	0.372406
1125	0.621265	0.367224
1126	0.618712	0.359629
1127	0.766609	0.343982
1128	0.764269	0.333618
1129	0.912474	0.329018
1130	0.911486	0.324904
1131	0.910982	0.330226
1132	0.91071	0.335564
1133	0.910893	0.337527
1134	0.911995	0.347687
1135	0.90989	0.365642
1136	0.927517	0.377954
1137	0.926541	0.391444
1138	0.918496	0.388468
1139	0.90857	0.385924
1140	0.916761	0.385556
1141	0.915075	0.381079
1142	0.914532	0.377616
1143	0.909213	0.384059
1144	0.906171	0.385247
1145	0.865491	0.384875
1146	0.912374	0.390586
1147	0.916869	0.421171
1148	0.929275	0.447083
1149	0.893982	0.437584
1150	0.721171	0.425792
1151	0.894698	0.410867
1152	0.865872	0.400469
1153	0.766784	0.393241
1154	0.76667	0.38339
1155	0.766044	0.376703
1156	0.765586	0.371332
1157	0.795906	0.36758
1158	0.815609	0.368485
1159	0.818036	0.372414
1160	0.883422	0.38338
1161	0.880638	0.392463
1162	0.874383	0.386324
1163	0.87121	0.380175
1164	0.893103	0.376857
1165	0.870378	0.374387
1166	0.870817	0.370945
1167	0.823493	0.372502
1168	0.818661	0.373238
1169	0.760627	0.372928
1170	0.815333	0.379046
1171	0.888495	0.403749
1172	0.879457	0.428553
1173	0.816342	0.427208
1174	0.813957	0.420101
1175	0.813418	0.405821
1176	0.811297	0.394606
1177	0.861553	0.386535
1178	0.860979	0.385854
1179	0.860083	0.387335
1180	0.860781	0.391812
1181	0.86126	0.396597
1182	0.86246	0.402443
1183	0.886178	0.415724
1184	0.900879	0.4333
1185	0.894083	0.438883
1186	0.868657	0.434084
1187	0.868688	0.434662
1188	0.618887	0.435119
1189	0.38116	0.431647
1190	0.170478	0.423715
1191	0.125195	0.415481
1192	0.116732	0.408953
1193	0.104974	0.402572
1194	0.169316	0.39672
1195	0.274437	0.414544
1196	0.381245	0.440038
1197	0.346805	0.423443
1198	0.270539	0.402879
1199	0.315891	0.396726
1200	0.253097	0.389588
1201	0.02862	0.374914
1202	0.027087	0.357547
1203	0.025588	0.338812
1204	0.025058	0.323083
1205	0.030848	0.321924
1206	0.041114	0.322074
1207	0.029323	0.331171
1208	0.041619	0.34717
1209	0.034936	0.352023
1210	0.026456	0.34815
1211	0.022515	0.346737
1212	0.020664	0.33592
1213	0.019189	0.319532
1214	0.016032	0.308651
1215	0.015558	0.304555
1216	0.015094	0.303625
1217	0.015301	0.309481
1218	0.016637	0.320353
1219	0.022001	0.336204
1220	0.033009	0.356105
1221	0.022603	0.34851
1222	0.019403	0.334175
1223	0.020218	0.32432
1224	0.018162	0.314514
1225	0.0135185	0.302413
1226	0.012522	0.297887
1227	0.011898	0.296546
1228	0.011211	0.293162
1229	0.011322	0.295542
1230	0.012798	0.30322
1231	0.015336	0.314839
1232	0.027056	0.328452
1233	0.023271	0.334587
1234	0.020989	0.331374
1235	0.020346	0.335313
1236	0.019297	0.332908
1237	0.018389	0.325662
1238	0.017577	0.315557
1239	0.01732	0.312802
1240	0.016992	0.317156
1241	0.017261	0.322892
1242	0.018374	0.326529
1243	0.024072	0.332481
1244	0.033866	0.362019
1245	0.024587	0.362834
1246	0.021229	0.352484
1247	0.018956	0.341951
1248	0.016953	0.32944
1249	0.0152935	0.320024
1250	0.013989	0.317745
1251	0.012975	0.319403
1252	0.012688	0.325284
1253	0.012911	0.327164
1254	0.014072	0.329187
1255	0.019258	0.342624
1256	0.028459	0.361364
1257	0.025681	0.364955
1258	0.024418	0.354717
1259	0.02244	0.352519
1260	0.021731	0.348937
1261	0.021677	0.349134
1262	0.0212	0.350844
1263	0.021485	0.34937
1264	0.021336	0.350803
1265	0.021833	0.34718
1266	0.022056	0.342308
1267	0.026722	0.355532
1268	0.035581	0.388821
1269	0.025155	0.367663
1270	0.022543	0.339446
1271	0.02001	0.313775
1272	0.016219	0.297541
1273	0.0146755	0.292463
1274	0.012638	0.280771
1275	0.011424	0.270642
1276	0.011553	0.268556
1277	0.013031	0.273492
1278	0.015517	0.285466
1279	0.019736	0.306975
1280	0.028317	0.331056
1281	0.02693	0.345198
1282	0.022892	0.344942
1283	0.022282	0.350431
1284	0.021285	0.348638
1285	0.020455	0.340332
1286	0.019394	0.33068
1287	0.018953	0.324168
1288	0.018449	0.315334
1289	0.018973	0.311676
1290	0.020011	0.312588
1291	0.02844	0.321477
1292	0.044494	0.341243
1293	0.03756	0.34717
1294	0.03063	0.351816
1295	0.023583	0.355182
1296	0.018738	0.355736
1297	0.0164655	0.357997
1298	0.015948	0.363869
1299	0.014866	0.364268
1300	0.014719	0.366295
1301	0.015703	0.369616
1302	0.017416	0.374723
1303	0.021645	0.382298
1304	0.038902	0.389379
1305	0.036408	0.395868
1306	0.027877	0.404066
1307	0.025431	0.405229
1308	0.02413	0.397517
1309	0.022576	0.395201
1310	0.021136	0.395347
1311	0.020738	0.399125
1312	0.020939	0.398685
1313	0.020572	0.396408
1314	0.021531	0.4037
1315	0.026578	0.425645
1316	0.036201	0.450717
1317	0.026914	0.427064
1318	0.023131	0.395292
1319	0.020952	0.379079
1320	0.018276	0.371414
1321	0.0168495	0.364091
1322	0.016755	0.354767
1323	0.0163	0.351084
1324	0.016203	0.353002
1325	0.017121	0.357337
1326	0.018663	0.366195
1327	0.022301	0.382329
1328	0.046458	0.405063
1329	0.042121	0.416371
1330	0.02864	0.418153
1331	0.025612	0.404993
1332	0.024327	0.391939
1333	0.021838	0.385459
1334	0.020191	0.383232
1335	0.019745	0.377056
1336	0.019565	0.377755
1337	0.01953	0.376365
1338	0.020569	0.375988
1339	0.026508	0.384431
1340	0.034078	0.401261
1341	0.027022	0.398547
1342	0.023919	0.393826
1343	0.022184	0.386667
1344	0.019434	0.373257
1345	0.018477	0.372361
1346	0.017989	0.362514
1347	0.016289	0.362818
1348	0.016395	0.363832
1349	0.016866	0.36607
1350	0.017872	0.376532
1351	0.022183	0.390353
1352	0.035132	0.412618
1353	0.030844	0.423437
1354	0.028583	0.417658
1355	0.025914	0.401832
1356	0.024378	0.393283
1357	0.02233	0.390355
1358	0.020548	0.390661
1359	0.019423	0.391563
1360	0.018959	0.389284
1361	0.019118	0.387423
1362	0.020439	0.394696
1363	0.029949	0.414539
1364	0.042276	0.437994
1365	0.033389	0.436792
1366	0.029788	0.430489
1367	0.025352	0.418895
1368	0.021329	0.404084
1369	0.0193355	0.376189
1370	0.017606	0.355423
1371	0.01577	0.344057
1372	0.015247	0.337908
1373	0.015302	0.335205
1374	0.016624	0.34143
1375	0.020008	0.356895
1376	0.033229	0.377738
1377	0.028766	0.38668
1378	0.024256	0.372789
1379	0.022119	0.371198
1380	0.020163	0.367305
1381	0.019284	0.361551
1382	0.019055	0.347034
1383	0.019458	0.343632
1384	0.01969	0.341919
1385	0.020287	0.342448
1386	0.020868	0.350693
1387	0.026643	0.379631
1388	0.03934	0.42108
1389	0.027447	0.413677
1390	0.024146	0.400965
1391	0.020014	0.393128
1392	0.018075	0.386648
1393	0.01604	0.373262
1394	0.014247	0.365445
1395	0.013033	0.366818
1396	0.01317	0.373319
1397	0.013707	0.381801
1398	0.014892	0.39494
1399	0.018725	0.416504
1400	0.035907	0.42459
1401	0.027353	0.424447
1402	0.023923	0.408507
1403	0.023636	0.405815
1404	0.021431	0.396924
1405	0.020381	0.388696
1406	0.019564	0.383287
1407	0.019694	0.385523
1408	0.019675	0.392499
1409	0.020304	0.401157
1410	0.020886	0.411234
1411	0.025879	0.42449
1412	0.034396	0.435401
1413	0.025876	0.414594
1414	0.022737	0.389439
1415	0.020862	0.375095
1416	0.019013	0.360887
1417	0.016408	0.347617
1418	0.015261	0.339378
1419	0.014419	0.338932
1420	0.01413	0.351134
1421	0.014666	0.364805
1422	0.0167	0.37515
1423	0.021091	0.388959
1424	0.034656	0.40324
1425	0.033029	0.409821
1426	0.025969	0.409758
1427	0.025633	0.408315
1428	0.022747	0.400913
1429	0.022217	0.39668
1430	0.021411	0.39459
1431	0.022138	0.392016
1432	0.021268	0.392
1433	0.021345	0.390915
1434	0.021646	0.396725
1435	0.027554	0.408675
1436	0.038627	0.421573
1437	0.027039	0.414022
1438	0.022799	0.400424
1439	0.020528	0.386735
1440	0.01798	0.377286
1441	0.01707	0.365661
1442	0.017101	0.353128
1443	0.015886	0.349625
1444	0.015304	0.352069
1445	0.015896	0.3621
1446	0.017758	0.377901
1447	0.023314	0.394415
1448	0.038405	0.417124
1449	0.0299	0.424954
1450	0.024469	0.409715
1451	0.023705	0.405677
1452	0.022426	0.402419
1453	0.021402	0.405276
1454	0.020036	0.404607
1455	0.020785	0.391809
1456	0.0207	0.384265
1457	0.020831	0.380123
1458	0.021853	0.381267
1459	0.028156	0.399878
1460	0.037715	0.421352
1461	0.026787	0.410509
1462	0.022583	0.399628
1463	0.020141	0.381792
1464	0.018391	0.367087
1465	0.0166325	0.357289
1466	0.015178	0.340585
1467	0.013962	0.336797
1468	0.013929	0.331511
1469	0.014362	0.337122
1470	0.016343	0.352072
1471	0.020056	0.368667
1472	0.030375	0.38675
1473	0.027725	0.385791
1474	0.022284	0.372724
1475	0.021514	0.379514
1476	0.020323	0.38565
1477	0.020111	0.398086
1478	0.020247	0.411191
1479	0.019735	0.414199
1480	0.019496	0.411189
1481	0.019651	0.408545
1482	0.021217	0.407709
1483	0.028922	0.424679
1484	0.03797	0.447659
1485	0.026056	0.423846
1486	0.021347	0.375989
1487	0.019489	0.342299
1488	0.016685	0.319894
1489	0.0139205	0.302638
1490	0.012369	0.288692
1491	0.011336	0.281021
1492	0.011606	0.282066
1493	0.013093	0.288541
1494	0.015622	0.299749
1495	0.019662	0.319488
1496	0.028351	0.339217
1497	0.027506	0.3517
1498	0.023542	0.343169
1499	0.023325	0.341308
1500	0.022667	0.341049
1501	0.021494	0.344824
1502	0.020428	0.349015
1503	0.020107	0.353934
1504	0.020226	0.35654
1505	0.020124	0.359171
1506	0.021353	0.364738
1507	0.031739	0.375376
1508	0.052812	0.395522
1509	0.038442	0.394088
1510	0.029825	0.385653
1511	0.023367	0.379361
1512	0.018811	0.363591
1513	0.015664	0.34129
1514	0.014202	0.325707
1515	0.012595	0.313879
1516	0.012167	0.303381
1517	0.012765	0.293519
1518	0.015381	0.290438
1519	0.021674	0.299344
1520	0.089873	0.310381
1521	0.077478	0.318228
1522	0.03843	0.315255
1523	0.025416	0.310199
1524	0.022456	0.308324
1525	0.021801	0.308477
1526	0.02129	0.318729
1527	0.02139	0.321929
1528	0.021054	0.322666
1529	0.022056	0.321979
1530	0.023491	0.32239
1531	0.034887	0.328763
1532	0.066881	0.357511
1533	0.069072	0.372402
1534	0.03974	0.373623
1535	0.028425	0.367837
1536	0.023334	0.354274
1537	0.0214215	0.336558
1538	0.017645	0.315118
1539	0.016297	0.302932
1540	0.015702	0.307828
1541	0.015839	0.313984
1542	0.017387	0.31872
1543	0.022102	0.331889
1544	0.048678	0.34698
1545	0.034026	0.348407
1546	0.024624	0.336001
1547	0.023927	0.34212
1548	0.023631	0.344261
1549	0.023682	0.352765
1550	0.023027	0.355988
1551	0.023017	0.350686
1552	0.022082	0.342205
1553	0.021984	0.330813
1554	0.024455	0.325315
1555	0.049807	0.340821
1556	0.066615	0.371921
1557	0.038469	0.372849
1558	0.026866	0.349452
1559	0.023716	0.32896
1560	0.021205	0.308371
1561	0.0186515	0.293742
1562	0.016272	0.284245
1563	0.015218	0.279211
1564	0.014665	0.278461
1565	0.015217	0.2875
1566	0.01728	0.300198
1567	0.020274	0.319847
1568	0.036134	0.343354
1569	0.033001	0.355563
1570	0.027708	0.347775
1571	0.025382	0.338904
1572	0.022942	0.332579
1573	0.022865	0.332222
1574	0.022396	0.33922
1575	0.022054	0.34659
1576	0.022085	0.342747
1577	0.022648	0.336596
1578	0.023175	0.33156
1579	0.031363	0.33504
1580	0.044607	0.356136
1581	0.03034	0.346515
1582	0.024802	0.327219
1583	0.0218	0.316114
1584	0.019543	0.304859
1585	0.017829	0.296134
1586	0.016823	0.290571
1587	0.015815	0.286655
1588	0.015811	0.285812
1589	0.016594	0.295633
1590	0.017977	0.299447
1591	0.023172	0.313423
1592	0.037895	0.33698
1593	0.036076	0.352535
1594	0.030631	0.359931
1595	0.027471	0.353929
1596	0.026619	0.34996
1597	0.025763	0.347742
1598	0.023557	0.34521
1599	0.022967	0.340355
1600	0.022682	0.338205
1601	0.022841	0.338146
1602	0.02439	0.338943
1603	0.031896	0.34384
1604	0.043892	0.35669
1605	0.03739	0.358226
1606	0.028847	0.347491
1607	0.024539	0.335022
1608	0.02076	0.325072
1609	0.0174135	0.321809
1610	0.017714	0.320687
1611	0.015751	0.313243
1612	0.015087	0.301675
1613	0.014912	0.298195
1614	0.01698	0.303481
1615	0.023377	0.315226
1616	0.042986	0.326187
1617	0.035357	0.327316
1618	0.022728	0.32225
1619	0.021205	0.313679
1620	0.02084	0.309083
1621	0.020541	0.302173
1622	0.020192	0.302215
1623	0.020387	0.304509
1624	0.021299	0.307279
1625	0.022901	0.310924
1626	0.024668	0.314743
1627	0.027345	0.318694
1628	0.036496	0.327775
1629	0.02947	0.324418
1630	0.022599	0.314402
1631	0.02042	0.30696
1632	0.018257	0.301084
1633	0.01666	0.287725
1634	0.01582	0.27339
1635	0.014327	0.269578
1636	0.014074	0.277557
1637	0.014587	0.289028
1638	0.016842	0.292817
1639	0.02153	0.301502
1640	0.029123	0.320566
1641	0.027657	0.330803
1642	0.024386	0.332393
1643	0.023849	0.32965
1644	0.023322	0.331311
1645	0.023898	0.337111
1646	0.023702	0.34408
1647	0.024191	0.349387
1648	0.023646	0.345723
1649	0.024459	0.339553
1650	0.024057	0.337247
1651	0.028318	0.353514
1652	0.041447	0.372096
1653	0.03407	0.365387
1654	0.028486	0.344828
1655	0.024153	0.326983
1656	0.021387	0.308124
1657	0.017733	0.294968
1658	0.017881	0.28825
1659	0.016667	0.280694
1660	0.016267	0.279467
1661	0.016108	0.280161
1662	0.018469	0.290455
1663	0.025386	0.305148
1664	0.028102	0.32568
1665	0.025896	0.341388
1666	0.023044	0.347908
1667	0.023829	0.348292
1668	0.024486	0.350857
1669	0.023512	0.353876
1670	0.02389	0.355173
1671	0.023542	0.353818
1672	0.02327	0.348063
1673	0.023643	0.344305
1674	0.024122	0.343734
1675	0.030918	0.353813
1676	0.042308	0.380838
1677	0.038177	0.375894
1678	0.031803	0.3634
1679	0.027082	0.348735
1680	0.021151	0.327562
1681	0.0193205	0.309165
1682	0.020893	0.303502
1683	0.019342	0.302353
1684	0.019436	0.312492
1685	0.020695	0.318551
1686	0.022831	0.323179
1687	0.031485	0.327443
1688	0.039279	0.34212
1689	0.034474	0.355901
1690	0.027468	0.35102
1691	0.024869	0.338846
1692	0.024271	0.335733
1693	0.022652	0.332044
1694	0.022606	0.32179
1695	0.023129	0.310235
1696	0.022903	0.30734
1697	0.023363	0.304341
1698	0.02441	0.303103
1699	0.029564	0.309244
1700	0.036947	0.329483
1701	0.027553	0.318966
1702	0.021595	0.291166
1703	0.019655	0.273352
1704	0.017892	0.263259
1705	0.015435	0.250684
1706	0.015359	0.251318
1707	0.014539	0.25287
1708	0.01426	0.2641
1709	0.015207	0.271734
1710	0.016718	0.28092
1711	0.027079	0.302345
1712	0.03175	0.32705
1713	0.024954	0.326691
1714	0.021904	0.311862
1715	0.019763	0.299934
1716	0.019195	0.300418
1717	0.018783	0.300254
1718	0.019418	0.298874
1719	0.019635	0.29479
1720	0.020402	0.297351
1721	0.02101	0.296678
1722	0.023063	0.298375
1723	0.026784	0.302608
1724	0.033841	0.31955
1725	0.027887	0.318989
1726	0.021761	0.307665
1727	0.019184	0.296351
1728	0.016508	0.281989
1729	0.0150995	0.259953
1730	0.01427	0.247452
1731	0.013379	0.240752
1732	0.013158	0.244247
1733	0.014425	0.255874
1734	0.016458	0.272449
1735	0.023208	0.30145
1736	0.027031	0.321573
1737	0.023087	0.322591
1738	0.020357	0.316631
1739	0.019245	0.301727
1740	0.018659	0.291885
1741	0.017903	0.290457
1742	0.018375	0.295061
1743	0.018868	0.297371
1744	0.019766	0.303214
1745	0.020404	0.309175
1746	0.021549	0.317487
1747	0.026339	0.323561
1748	0.036737	0.344071
1749	0.034925	0.354251
1750	0.024939	0.333904
1751	0.020398	0.321549
1752	0.018134	0.306429
1753	0.0160395	0.29741
1754	0.015635	0.292575
1755	0.014972	0.295771
1756	0.01496	0.2966
1757	0.016353	0.299259
1758	0.01888	0.309557
1759	0.025649	0.321751
1760	0.027516	0.343876
1761	0.02468	0.348286
1762	0.022847	0.336893
1763	0.022094	0.319325
1764	0.022214	0.32383
1765	0.023422	0.33774
1766	0.024351	0.350652
1767	0.025316	0.356012
1768	0.026435	0.35805
1769	0.029556	0.363915
1770	0.033755	0.374187
1771	0.039744	0.394936
1772	0.053323	0.423917
1773	0.041688	0.423245
1774	0.02593	0.41048
1775	0.021244	0.392844
1776	0.018099	0.37255
1777	0.0164125	0.350224
1778	0.014481	0.325183
1779	0.012783	0.305411
1780	0.011854	0.299048
1781	0.0134	0.296853
1782	0.015912	0.296963
1783	0.023385	0.311569
1784	0.023297	0.328904
1785	0.022187	0.329977
1786	0.023012	0.335373
1787	0.021869	0.3399
1788	0.021019	0.342688
1789	0.021443	0.343561
1790	0.02305	0.345123
1791	0.023676	0.347404
1792	0.026607	0.348353
1793	0.028971	0.345411
1794	0.028329	0.34227
1795	0.02719	0.344801
1796	0.031928	0.357684
1797	0.029724	0.348445
1798	0.024694	0.328559
1799	0.020158	0.318502
1800	0.016856	0.313426
1801	0.0155025	0.306722
1802	0.013395	0.299481
1803	0.012767	0.303375
1804	0.013513	0.306153
1805	0.015009	0.314117
1806	0.017535	0.320154
1807	0.021836	0.329507
1808	0.024845	0.350707
1809	0.025491	0.35769
1810	0.025763	0.338912
1811	0.024444	0.330204
1812	0.023145	0.326284
1813	0.022532	0.328378
1814	0.023112	0.329455
1815	0.024367	0.329954
1816	0.02653	0.335134
1817	0.030262	0.340703
1818	0.031505	0.346514
1819	0.032412	0.361716
1820	0.039961	0.381231
1821	0.036096	0.39193
1822	0.029546	0.385661
1823	0.025437	0.371012
1824	0.021571	0.348731
1825	0.021498	0.336049
1826	0.018577	0.333775
1827	0.018507	0.338336
1828	0.018608	0.345923
1829	0.019686	0.366515
1830	0.022682	0.38414
1831	0.032349	0.400383
1832	0.034697	0.408687
1833	0.031342	0.397964
1834	0.027624	0.368549
1835	0.025782	0.350421
1836	0.024756	0.338148
1837	0.023609	0.33191
1838	0.02445	0.337495
1839	0.025505	0.345897
1840	0.026529	0.347727
1841	0.027248	0.356026
1842	0.028569	0.365713
1843	0.034841	0.399522
1844	0.048459	0.451934
1845	0.04199	0.466105
1846	0.031975	0.453343
1847	0.026747	0.435629
1848	0.022778	0.427207
1849	0.021335	0.40982
1850	0.019386	0.401394
1851	0.018312	0.398208
1852	0.018012	0.392597
1853	0.019545	0.387856
1854	0.02395	0.381848
1855	0.033031	0.386492
1856	0.034727	0.393531
1857	0.030257	0.383958
1858	0.026623	0.368912
1859	0.02331	0.350501
1860	0.022271	0.348898
1861	0.021354	0.359988
1862	0.021812	0.37265
1863	0.02323	0.377442
1864	0.024598	0.373874
1865	0.026713	0.367369
1866	0.026236	0.375131
1867	0.030306	0.39474
1868	0.045269	0.424858
1869	0.034735	0.419616
1870	0.026433	0.388252
1871	0.020943	0.357063
1872	0.018293	0.326028
1873	0.0165525	0.316883
1874	0.015151	0.307422
1875	0.014542	0.301635
1876	0.014558	0.300855
1877	0.015848	0.30786
1878	0.019293	0.323008
1879	0.027119	0.340266
1880	0.028699	0.354901
1881	0.023915	0.352841
1882	0.020791	0.345678
1883	0.019297	0.329719
1884	0.019927	0.317986
1885	0.019388	0.320304
1886	0.01961	0.324987
1887	0.020456	0.32428
1888	0.022173	0.323797
1889	0.02382	0.323724
1890	0.024559	0.322108
1891	0.026956	0.327149
1892	0.034504	0.344455
1893	0.030155	0.347291
1894	0.022129	0.327919
1895	0.018966	0.309526
1896	0.016267	0.294378
1897	0.014988	0.279118
1898	0.012928	0.270476
1899	0.01181	0.267217
1900	0.012452	0.256865
1901	0.013909	0.252952
1902	0.016373	0.263479
1903	0.023299	0.287527
1904	0.026144	0.31447
1905	0.023669	0.323405
1906	0.023018	0.327824
1907	0.021136	0.322726
1908	0.019971	0.326413
1909	0.020715	0.330296
1910	0.0223	0.331102
1911	0.022636	0.329234
1912	0.024213	0.326562
1913	0.027587	0.323268
1914	0.025485	0.322475
1915	0.028408	0.329107
1916	0.039617	0.348908
1917	0.034641	0.356993
1918	0.022946	0.33912
1919	0.02049	0.310922
1920	0.016841	0.288344
1921	0.014384	0.277348
1922	0.012847	0.273933
1923	0.012513	0.259357
1924	0.012836	0.253213
1925	0.014711	0.253564
1926	0.018052	0.270885
1927	0.028624	0.301192
1928	0.027604	0.321072
1929	0.025363	0.323159
1930	0.024121	0.324741
1931	0.023116	0.317847
1932	0.021986	0.308764
1933	0.022326	0.303816
1934	0.022443	0.300425
1935	0.022547	0.301577
1936	0.02456	0.298565
1937	0.02454	0.304858
1938	0.023752	0.317649
1939	0.028696	0.318772
1940	0.04043	0.331878
1941	0.041663	0.346647
1942	0.030661	0.340299
1943	0.023469	0.324147
1944	0.019653	0.297848
1945	0.0185685	0.278582
1946	0.015973	0.278839
1947	0.014597	0.28393
1948	0.014631	0.294869
1949	0.016447	0.312243
1950	0.019439	0.32721
1951	0.02965	0.353526
1952	0.031055	0.378987
1953	0.024183	0.390181
1954	0.021828	0.385078
1955	0.020984	0.377049
1956	0.021393	0.373347
1957	0.0218	0.380025
1958	0.023526	0.379436
1959	0.024667	0.367179
1960	0.025584	0.356252
1961	0.026337	0.351514
1962	0.027717	0.350734
1963	0.030536	0.365929
1964	0.044091	0.40046
1965	0.041585	0.405486
1966	0.028227	0.397946
1967	0.023327	0.383924
1968	0.019271	0.3679
1969	0.0165155	0.345861
1970	0.013412	0.31871
1971	0.012885	0.301751
1972	0.013707	0.293997
1973	0.015161	0.302304
1974	0.018603	0.319933
1975	0.025961	0.350664
1976	0.029056	0.371893
1977	0.025013	0.377568
1978	0.023263	0.377936
1979	0.023417	0.374156
1980	0.022596	0.368623
1981	0.022473	0.355117
1982	0.024121	0.352242
1983	0.028088	0.35655
1984	0.032079	0.360244
1985	0.033478	0.363382
1986	0.032281	0.366194
1987	0.031894	0.378703
1988	0.043188	0.403317
1989	0.04342	0.39784
1990	0.02745	0.383363
1991	0.02292	0.367131
1992	0.019854	0.349255
1993	0.019	0.333382
1994	0.016792	0.33667
1995	0.015936	0.347066
1996	0.015171	0.357835
1997	0.016387	0.364546
1998	0.019499	0.363918
1999	0.029883	0.371966
[truncated: 6,761 more rows]

## Sheet: Techno-economic Inputs
Electrolytic Hydrogen Model Inputs	Unit	Values	Source/comment
General
Economic lifetime, T	years	20	Michalski, J. et al. (2017)
Cost of capital (WACC), r	%	0.08
Number of hours per year, m	h	8760
Federal tax rate, alpha	%	0.21	taxfoundation.org
Federal tax depreciation method, d	type	3	20-year 150%-declining balance depreciation schedule
Degradation Factor, x	%	0.01	Buttler and Spiethoff (2018), BloombergNEF (2019), U.S. Department of Energy (2019)
Wind Energy Component
System price, SP_w	$/kW	1609	LCOE Tool 2024, Lazard, 2024, LBNL 2024
Fixed operating cost, F_wi	$/kW	12.84	Hitachi Velocity Suite 2024, LCOE Tool 2024
Variable operating cost, W_wi	$/kWh	0.0013	Hitachi Velocity Suite 2024, LCOE Tool 2024
Capacity factor, CF_w	%	0.405281	Average of hourly values for representative, median location
Production Tax Credit (45Y), PTC_ei	$/kWh	0.015	Technology neutral, for wind and solar up until 0.03 possible
Solar Energy Component
System price, SP_s	$/kW	1133	LCOE Tool 2024, NREL 2024, LBNL 2024
Fixed operating cost, F_si	$/kW	5.133	Hitachi Velocity Suite 2024, LCOE Tool 2024
Variable operating cost, W_si	$/kWh	0.0005	Hitachi Velocity Suite 2024, LCOE Tool 2024
Capacity factor, CF_s	%	0.25298	Average of hourly values for representative, median location
Production Tax Credit (45Y), PTC_ei	$/kWh	0.015	Technology neutral, for wind and solar up until 0.03 possible
Power-to-Gas (PtG)
PtG Technology	type	PEM	Further technologies include Alkaline and Solid Oxide Cell electrolysis
System price, SP	$/kW	1500	NREL, 2024
Fixed operating cost, F	$/kW	45
Conversion rate, η	kg/kWh	0.0188545	Glenk et al. 2023				Hydrogen Production Tax Credits (45V)
.. Inverse conversion rate	kWh/kg	53.0376						Carbon Intensity (CO2e per kg H2)	Tax Credit Eligibility Percentage	PTC per kg H2 (in $)	With ‘Qualifying Facilities’ Multiplier (5x)
.. Conversion efficiency	%	0.628485
.. .. Heating value in MJ/kg	MJ/kg	120					1	2.5kg to 4kg	0.2	0.12	0.6
.. .. Conversion factor to kg	kWh/MJ	0.277778					2	1.5kg to 2.5kg	0.25	0.15	0.75
Variable cost increment, w_o	$/kg	0.1	water costs etc.				3	0.45kg to 1.5kg	0.334	0.2	1
Production Tax Credit (45Y), PTC_hi	$/kg	3	maximum amount, see table				4	Less than 0.45kg	1	0.6	3
Market Prices & Carbon Intensity
Base year	year	2024
Average electricity selling price, s	$/kWh	0.0467672	Average of hourly values
Average electricity buying price, q	$/kWh	0.0547261
Markup on buying price	$/kWh	0.00788008
Carbon Intensity of the Grid, CI_e	kg CO2e/kWh	0.386164

## Sheet: Outputs
Electrolytic Hydrogen Model Outputs
Hydrogen Price of 1.0 $/kg	Unit	Accouting Rule A	Accouting Rule B	Accouting Rule C	Accouting Rule D
Metric
Optimal PtG Size, k_h	kWe	0.290757	0.30078	0.46272	0.44554
Optimal Share of Wind Energy, s	kWe	0.628375	0.652786	0.986028	0.993148
Maximum Net Present Value, NPV	$	54.3225	69.4028	273.134	269.832
Internal Rate of Return, IRR	%	0.0855376	0.0870038	0.103543	0.103536
Lifecycle Carbon Intensity of Hydrogen, CI_h	kg CO2/kg H2	0.109674	0.45	6.42602	6.38004
Policy Impact, PI	kg H2/$	0.496765	0.496765	0.496829	0.496765
Average Production Tax Credit of Hydrogen during PTC period, PTC_hi	$/kg	3	3	3	3
Total Annual Production Tax Credit of H₂ received during PTC period, Σ(PTC_hi)	$	107.919	113.759	204.23	204.779
Average Carbon Intensity of Hydrogen during PTC period, CI_hi	kg CO2/kg H2	0.109674	0.45	6.42684	6.38004
Average Carbon Intensity of Hydrogen after PTC period, CI_hi	kg CO2/kg H2	0	0	0.00199376	21.4757
Yearly Hydrogen Production during PTC period, q_hi	kg	35.9731	37.9197	68.0766	68.2597
Yearly Hydrogen Production after PTC period, q_hi	kg	0	0	0.008755	1.37845e-06
Hydrogen Price of 1.5 $/kg	Unit	Accouting Rule A	Accouting Rule B	Accouting Rule A	Accouting Rule B
Metric
Optimal PtG Size, k_h	kWe	0.357667	0.369905	0.464335	0.996596
Optimal Share of Wind Energy, s	kWe	0.662229	0.672561	0.97993	0.989568
Maximum Net Present Value, NPV	$	156.716	175.387	447.743	462.545
Internal Rate of Return, IRR	%	0.0952522	0.0969435	0.12035	0.110992
Lifecycle Carbon Intensity of Hydrogen, CI_h	kg CO2/kg H2	0.700664	0.92974	6.14431	11.5753
Policy Impact, PI	kg H2/$	0.571801	0.569684	0.5564	0.554828
Average Production Tax Credit of Hydrogen during PTC period, PTC_hi	$/kg	2.99236	3	3	3
Total Annual Production Tax Credit of H₂ received during PTC period, Σ(PTC_hi)	$	126.745	132.574	203.759	444.15
Average Carbon Intensity of Hydrogen during PTC period, CI_hi	kg CO2/kg H2	0.194855	0.45	6.4111	11.9418
Average Carbon Intensity of Hydrogen after PTC period, CI_hi	kg CO2/kg H2	4.11561	4.19798	3.92188	8.43966
Yearly Hydrogen Production during PTC period, q_hi	kg	42.3562	44.1914	67.9198	148.05
Yearly Hydrogen Production after PTC period, q_hi	kg	6.27364	6.48679	8.1535	17.3046
Hydrogen Price of 2.0 $/kg	Unit	Accouting Rule A	Accouting Rule B	Accouting Rule A	Accouting Rule B
Metric
Optimal PtG Size, k_h	kWe	0.420514	0.418667	0.467647	0.997548
Optimal Share of Wind Energy, s	kWe	0.704043	0.712727	0.945884	0.95525
Maximum Net Present Value, NPV	$	298.541	319.268	642.576	905.83
Internal Rate of Return, IRR	%	0.107353	0.109216	0.135088	0.13917
Lifecycle Carbon Intensity of Hydrogen, CI_h	kg CO2/kg H2	2.80992	2.60939	5.9576	11.7091
Policy Impact, PI	kg H2/$	0.953437	0.925539	0.841154	0.820995
Average Production Tax Credit of Hydrogen during PTC period, PTC_hi	$/kg	2.90066	3	3	3
Total Annual Production Tax Credit of H₂ received during PTC period, Σ(PTC_hi)	$	141.691	144.651	201.133	455.126
Average Carbon Intensity of Hydrogen during PTC period, CI_hi	kg CO2/kg H2	0.796842	0.45	6.34592	12.1532
Average Carbon Intensity of Hydrogen after PTC period, CI_hi	kg CO2/kg H2	5.16236	5.11119	5.39748	11.0287
Yearly Hydrogen Production during PTC period, q_hi	kg	48.8478	48.217	67.0442	151.709
Yearly Hydrogen Production after PTC period, q_hi	kg	41.801	41.6177	46.4793	99.0177
Hydrogen Price of 2.5 $/kg	Unit	Accouting Rule A	Accouting Rule B	Accouting Rule A	Accouting Rule B
Metric
Optimal PtG Size, k_h	kWe	0.511072	0.519675	0.468833	0.99525
Optimal Share of Wind Energy, s	kWe	0.783626	0.810906	0.990815	0.995087
Maximum Net Present Value, NPV	$	494.4	508.355	884.862	1421.1
Internal Rate of Return, IRR	%	0.120724	0.121385	0.152465	0.168014
Lifecycle Carbon Intensity of Hydrogen, CI_h	kg CO2/kg H2	4.51491	3.90526	6.24778	11.7614
Policy Impact, PI	kg H2/$	1.17678	1.1072	0.936666	0.912417
Average Production Tax Credit of Hydrogen during PTC period, PTC_hi	$/kg	2.69162	3	3	3
Total Annual Production Tax Credit of H₂ received during PTC period, Σ(PTC_hi)	$	157.444	163.416	204.599	459.492
Average Carbon Intensity of Hydrogen during PTC period, CI_hi	kg CO2/kg H2	2.10775	0.45	6.44715	12.0449
Average Carbon Intensity of Hydrogen after PTC period, CI_hi	kg CO2/kg H2	6.65386	6.71709	6.02264	11.4225
Yearly Hydrogen Production during PTC period, q_hi	kg	58.4943	54.4719	68.1997	153.164
Yearly Hydrogen Production after PTC period, q_hi	kg	65.8288	66.9367	60.393	128.155
Hydrogen Price of 3.0 $/kg	Unit	Accouting Rule A	Accouting Rule B	Accouting Rule A	Accouting Rule B
Metric
Optimal PtG Size, k_h	kWe	0.705989	0.637915	0.469737	0.996063
Optimal Share of Wind Energy, s	kWe	0.999341	0.98685	0.999176	0.993485
Maximum Net Present Value, NPV	$	767.536	738	1129.57	1958.02
Internal Rate of Return, IRR	%	0.131615	0.131824	0.16966	0.195976
Lifecycle Carbon Intensity of Hydrogen, CI_h	kg CO2/kg H2	7.10325	5.07336	6.40695	11.9116
Policy Impact, PI	kg H2/$	1.50039	1.23622	0.976392	0.947361
Average Production Tax Credit of Hydrogen during PTC period, PTC_hi	$/kg	2.21723	3	3	3
Total Annual Production Tax Credit of H₂ received during PTC period, Σ(PTC_hi)	$	178.605	180.765	205.244	463.146
Average Carbon Intensity of Hydrogen during PTC period, CI_hi	kg CO2/kg H2	4.91549	0.45	6.47253	12.0909
Average Carbon Intensity of Hydrogen after PTC period, CI_hi	kg CO2/kg H2	8.87869	8.17932	6.33902	11.714
Yearly Hydrogen Production during PTC period, q_hi	kg	80.5531	60.2548	68.4147	154.382
Yearly Hydrogen Production after PTC period, q_hi	kg	99.261	89.6922	66.0545	140.034
Hydrogen Price of 3.5 $/kg	Unit	Accouting Rule A	Accouting Rule B	Accouting Rule A	Accouting Rule B
Metric
Optimal PtG Size, k_h	kWe	0.815878	0.708842	0.483573	0.998912
Optimal Share of Wind Energy, s	kWe	0.987155	0.997246	0.998114	0.851473
Maximum Net Present Value, NPV	$	1105.83	1001.43	1377.49	2497.34
Internal Rate of Return, IRR	%	0.14698	0.144539	0.185588	0.224818
Lifecycle Carbon Intensity of Hydrogen, CI_h	kg CO2/kg H2	8.73813	5.83655	6.59266	12.5154
Policy Impact, PI	kg H2/$	1.80127	1.31702	1.01237	0.96321
Average Production Tax Credit of Hydrogen during PTC period, PTC_hi	$/kg	1.85638	3	3	3
Total Annual Production Tax Credit of H₂ received during PTC period, Σ(PTC_hi)	$	178.74	189.033	205.162	468.432
Average Carbon Intensity of Hydrogen during PTC period, CI_hi	kg CO2/kg H2	6.91171	0.45	6.51502	12.6079
Average Carbon Intensity of Hydrogen after PTC period, CI_hi	kg CO2/kg H2	10.2066	9.09875	6.66746	12.417
Yearly Hydrogen Production during PTC period, q_hi	kg	96.2837	63.0109	68.3874	156.144
Yearly Hydrogen Production after PTC period, q_hi	kg	119.753	104.044	70.9811	146.614
